# Supplementary material
Source: publisher site journal article supplement (https://www.spandidos-publications.com/1535/downloadSupplementary)
Supplement: Supplementary file 1 [file downloadSupplementary]

## Sheet: Sheet1
Table SIV. KEGG pathway enrichment analysis of each module
Node1	Node1_type	Node2	Node2_type	neighborhood_on_chromosome	gene_fusion	phylogenetic_cooccurrence	homology	coexpression	experimentally_determined_interaction	database_annotated	automated_textmining	combined_score
PSMB9	up	PSMB10	up	0	0	0	0.755	0.847	0.963	0.9	0.95	0.999
PSAT1	down	PHGDH	down	0.185	0	0	0	0.95	0.413	0.9	0.916	0.999
ITGB2	up	ITGAL	up	0	0	0	0	0.418	0.892	0.9	0.866	0.999
COL4A1	up	COL4A2	up	0	0	0.433	0.886	0.963	0.886	0.9	0.87	0.999
SUCLG2	down	SUCLG1	down	0.185	0.486	0.448	0	0.634	0.947	0.9	0.84	0.999
HLA-DMB	up	HLA-DMA	up	0	0	0	0	0.771	0.826	0.9	0.949	0.999
PRF1	up	GZMB	up	0	0	0	0	0.78	0.379	0.9	0.951	0.999
C1QC	up	C1QB	up	0	0	0.426	0.927	0.989	0.454	0.9	0.893	0.999
C1QA	up	C1QB	up	0	0	0.389	0.86	0.989	0.885	0.9	0.844	0.999
PLAU	down	SERPINE1	up	0	0	0	0	0.214	0.881	0.9	0.926	0.999
ATP6V1C2	down	ATP6V1B1	down	0	0	0	0	0.328	0.951	0.9	0.814	0.999
ITGAL	up	ICAM1	up	0	0	0	0	0.09	0.887	0.9	0.932	0.999
PGF	up	FLT1	up	0	0	0	0	0	0.877	0.9	0.958	0.999
SERPINE1	up	PLAT	down	0	0	0	0	0.148	0.881	0.9	0.956	0.999
CYFIP2	down	NCKAP1L	up	0	0	0	0	0.431	0.948	0.9	0.707	0.999
VEGFA	up	FLT1	up	0	0	0	0	0.061	0.556	0.9	0.984	0.999
HLA-DRA	up	CD74	up	0	0	0	0	0.924	0.889	0.9	0.574	0.999
UQCRFS1	down	UQCRC1	down	0	0	0	0	0.828	0.999	0.9	0.786	0.999
HLA-DQB1	up	HLA-DQA1	up	0	0	0	0.641	0.546	0.938	0.9	0.944	0.998
RAC2	up	ARHGDIB	up	0	0	0	0	0.639	0.941	0.9	0.573	0.998
CXCR4	up	CXCL12	down	0	0	0	0	0	0.457	0.9	0.971	0.998
NPHS1	down	NPHS2	down	0	0	0	0	0.062	0.42	0.9	0.976	0.998
PLG	down	SERPINE1	up	0	0	0	0	0.063	0.435	0.9	0.978	0.998
TREM2	up	TYROBP	up	0	0	0	0	0.535	0.379	0.9	0.925	0.997
BDKRB2	down	KNG1	down	0	0	0	0	0	0.667	0.9	0.933	0.997
HADH	down	ECHS1	down	0.072	0.79	0.282	0	0.501	0	0.9	0.724	0.997
ATP6V0D2	down	ATP6V1B1	down	0.167	0	0	0	0.585	0.76	0.9	0.77	0.997
CASP1	up	PYCARD	up	0	0	0	0	0.201	0.582	0.9	0.927	0.997
C1QA	up	C1QC	up	0	0	0.397	0.825	0.954	0.379	0.9	0.763	0.997
MTTP	down	APOB	up	0	0	0	0	0.546	0.379	0.9	0.927	0.997
ATP6V0A4	down	ATP6V1B1	down	0.111	0	0	0	0.27	0.622	0.9	0.925	0.997
PRF1	up	GZMA	up	0	0	0	0	0.729	0	0.9	0.87	0.996
HLA-DMB	up	HLA-DRA	up	0	0	0	0.663	0.819	0.76	0.9	0.69	0.996
HLA-DPA1	up	CD74	up	0	0	0	0	0.825	0.47	0.9	0.547	0.995
CD247	up	CD3D	up	0	0	0	0	0.756	0.379	0.9	0.734	0.995
HADH	down	ACAA1	down	0.093	0.077	0.258	0	0.156	0.35	0.9	0.89	0.995
CCL5	up	CXCL10	up	0	0	0	0	0.309	0.226	0.9	0.921	0.995
HLA-DPB1	up	HLA-DPA1	up	0	0	0	0.68	0.435	0.899	0.9	0.895	0.995
HLA-DQB2	up	CD74	up	0	0	0	0	0.804	0.41	0.9	0.651	0.995
ATP6V0D2	down	ATP6V1C2	down	0	0	0	0	0.459	0.721	0.9	0.724	0.995
CLCNKB	down	BSND	down	0	0	0	0	0.071	0	0.9	0.95	0.995
VAV1	up	RAC2	up	0	0	0	0	0.353	0.73	0.9	0.701	0.994
COL5A2	up	COL1A1	up	0	0	0.444	0.949	0.945	0	0.9	0.76	0.994
HLA-DQB1	up	CD74	up	0	0	0	0	0.706	0.72	0.9	0.426	0.994
HLA-DRA	up	HLA-DMA	up	0	0	0	0.713	0.479	0.87	0.9	0.715	0.994
CD27	up	CD70	up	0	0	0	0	0	0.379	0.9	0.922	0.994
PROC	down	PROCR	up	0	0	0	0	0	0.87	0.9	0.619	0.994
LY86	up	LY96	up	0	0	0	0	0.231	0.379	0.9	0.891	0.994
ASPM	up	NCAPG	up	0	0	0	0	0.991	0	0	0.293	0.993
DOCK2	up	RAC2	up	0	0	0	0	0.566	0.606	0.9	0.638	0.993
HLA-DQA1	up	CD74	up	0	0	0	0	0.598	0.701	0.9	0.5	0.993
BMP7	down	SOSTDC1	down	0	0	0	0	0.069	0.379	0.9	0.904	0.993
VEGFA	up	EGF	down	0	0	0	0	0	0	0.9	0.937	0.993
CHGB	down	SCG2	up	0	0	0	0	0.296	0	0.9	0.898	0.992
CASP1	up	AIM2	up	0	0	0	0	0.093	0.294	0.9	0.891	0.992
PTHLH	up	PTH1R	down	0	0	0	0	0	0.379	0.9	0.885	0.992
GRHPR	down	AGXT	down	0.295	0.157	0	0	0.188	0	0.9	0.869	0.992
CDKN1C	down	CCND1	up	0	0	0	0	0.063	0.81	0.9	0.64	0.992
PLG	down	HRG	down	0	0	0	0	0.428	0.379	0.9	0.817	0.992
HOGA1	down	GRHPR	down	0.219	0	0	0	0.152	0	0.9	0.883	0.991
CCL5	up	CXCL9	up	0	0	0	0	0.266	0.221	0.9	0.861	0.991
CD2	up	CD247	up	0	0	0	0	0.776	0.379	0.9	0.448	0.991
CD40	up	BIRC3	up	0	0	0	0	0.107	0.811	0.9	0.531	0.991
ATP6V0A4	down	ATP6V0D2	down	0.111	0	0	0	0.188	0.698	0.9	0.689	0.991
NEDD4L	down	SCNN1G	down	0	0	0	0	0	0.454	0.9	0.849	0.991
HADH	down	ACAT1	down	0.093	0.013	0.264	0	0.463	0.35	0.9	0.715	0.991
NEDD4L	down	SCNN1A	down	0	0	0	0	0	0.472	0.9	0.844	0.991
GLDC	down	SHMT2	up	0.219	0.133	0	0	0.324	0	0.9	0.821	0.99
FN1	up	ALB	down	0	0	0	0	0.077	0.104	0.9	0.899	0.99
ATP6V1G3	down	ATP6V1C2	down	0	0	0	0	0.147	0.559	0.9	0.785	0.99
FN1	up	ITGA5	up	0	0	0	0	0.153	0.379	0.9	0.841	0.99
ATP6V0D2	down	ATP6V1G3	down	0	0	0	0	0.189	0.644	0.9	0.694	0.989
NUSAP1	up	NCAPG	up	0	0	0	0	0.981	0	0	0.472	0.989
ATP6V1G3	down	ATP6V1B1	down	0	0	0	0	0.113	0.56	0.9	0.762	0.989
HLA-DMA	up	CD74	up	0	0	0	0	0.525	0.472	0.9	0.641	0.989
ITGB2	up	ICAM1	up	0	0	0	0	0.113	0.379	0.9	0.829	0.989
HAO2	down	AGXT	down	0	0	0	0	0.685	0.267	0.9	0.582	0.989
HLA-DQB2	up	HLA-DQA1	up	0	0	0	0.672	0.552	0.736	0.9	0.614	0.989
CSF1R	up	SPI1	up	0	0	0	0	0.71	0	0.8	0.812	0.988
VEGFA	up	FN1	up	0	0	0	0	0.076	0	0.9	0.88	0.988
PECAM1	up	CDH5	up	0	0	0	0	0.143	0	0.8	0.938	0.988
AIM2	up	PYCARD	up	0	0	0	0	0.061	0.447	0.9	0.797	0.988
CXCL9	up	CXCL10	up	0	0	0	0.862	0.848	0.221	0.9	0.951	0.988
VEGFA	up	CDH5	up	0	0	0	0	0.061	0	0.9	0.882	0.988
FN1	up	EGF	down	0	0	0	0	0	0	0.9	0.888	0.988
OAT	down	ARG2	down	0.185	0	0	0	0.343	0.132	0.9	0.786	0.988
TOP2A	up	NCAPG	up	0	0	0	0	0.967	0.085	0	0.644	0.988
CYBB	up	RAC2	up	0	0	0	0	0.263	0.384	0.9	0.753	0.987
BMPR1B	down	BMP7	down	0	0	0	0	0	0.541	0.9	0.758	0.987
HLA-G	up	HLA-F	up	0	0	0	0.978	0.076	0.869	0.9	0.794	0.987
TNNT2	down	TNNC1	down	0	0	0	0	0.356	0.524	0.9	0.636	0.987
CDKN1C	down	CCND2	up	0	0	0	0	0.061	0.686	0.9	0.599	0.986
PC	down	PCK2	down	0	0	0	0	0.064	0	0.9	0.869	0.986
ATP6V0A4	down	ATP6V1C2	down	0	0	0	0	0.148	0.42	0.9	0.763	0.986
VEGFA	up	ALB	down	0	0	0	0	0.062	0	0.9	0.871	0.986
ALB	down	APOB	up	0	0	0	0	0.564	0	0.9	0.709	0.986
VEGFA	up	VWF	up	0	0	0	0	0	0	0.9	0.87	0.986
SPARC	up	COL1A1	up	0	0	0	0	0.94	0.456	0	0.627	0.986
PSMB9	up	TAP1	up	0	0	0	0	0.917	0.348	0	0.752	0.985
HLA-DMB	up	CD74	up	0	0	0	0	0.631	0.379	0.9	0.445	0.985
VCAN	up	DCN	down	0	0	0	0	0.063	0.085	0.9	0.852	0.985
HAO2	down	PIPOX	down	0	0	0	0	0.515	0	0.9	0.721	0.985
KNG1	down	F12	up	0	0	0	0	0.099	0.305	0.9	0.791	0.985
SHMT2	up	TYMS	up	0.174	0	0	0	0.2	0	0.9	0.812	0.985
FN1	up	PLG	down	0	0	0	0	0	0.294	0.9	0.8	0.984
CTSS	up	CD74	up	0	0	0	0	0.621	0.161	0.9	0.571	0.984
NUSAP1	up	TOP2A	up	0	0	0	0	0.966	0	0	0.562	0.984
ALDH4A1	down	PRODH2	down	0.058	0	0	0	0.292	0.157	0.9	0.76	0.984
AGXT	down	AGXT2	down	0.166	0	0	0	0.208	0	0.9	0.797	0.984
IGFBP3	up	FN1	up	0	0	0	0	0.303	0.379	0.9	0.685	0.984
ACADSB	down	ECHS1	down	0.048	0	0.3	0	0.352	0.085	0.9	0.663	0.983
PCCB	down	BCKDHB	down	0.078	0	0	0	0.651	0	0.9	0.55	0.983
CXCL12	down	CCL20	up	0	0	0	0	0	0.546	0.9	0.674	0.983
PLG	down	KNG1	down	0	0	0	0	0.262	0.379	0.9	0.677	0.983
ITGB2	up	ITGA4	up	0	0	0	0	0.154	0.382	0.9	0.724	0.983
PLG	down	VWF	up	0	0	0	0	0	0	0.9	0.845	0.983
PIPOX	down	AGXT	down	0.13	0	0	0	0.588	0	0.9	0.595	0.983
SERPINA1	up	ALB	down	0	0	0	0	0.292	0	0.9	0.789	0.983
ALDH4A1	down	OAT	down	0.075	0	0	0	0.093	0	0.9	0.824	0.983
NEDD4L	down	SCNN1B	down	0	0	0	0	0	0.472	0.9	0.709	0.983
CCL5	up	CXCR4	up	0	0	0	0	0.061	0.05	0.9	0.832	0.983
MYL3	down	TNNT2	down	0	0	0	0	0.335	0.16	0.9	0.742	0.983
VEGFA	up	SERPINE1	up	0	0	0	0	0.076	0	0.9	0.821	0.982
FN1	up	SPARC	up	0	0	0	0	0.279	0.342	0.9	0.675	0.982
HMGCS2	down	ACAT1	down	0.093	0	0	0	0.19	0.37	0.9	0.677	0.982
ATP6V0A4	down	ATP6V1G3	down	0	0	0	0	0.065	0.402	0.9	0.719	0.982
HLA-DMB	up	HLA-DPA1	up	0	0	0	0.676	0.701	0.268	0.9	0.663	0.981
SERPINA1	up	CP	up	0	0	0	0	0.118	0	0.9	0.801	0.981
HOGA1	down	AGXT	down	0.078	0	0	0	0.284	0	0.9	0.748	0.981
CCL5	up	CXCL12	down	0	0	0	0	0	0.201	0.9	0.791	0.981
TST	down	CTH	down	0.219	0.128	0	0	0.064	0	0.9	0.752	0.981
CAV1	up	CAV2	up	0	0	0	0.858	0.819	0.454	0.8	0.98	0.981
FN1	up	VWF	up	0	0	0	0	0.061	0	0.9	0.807	0.98
ALB	down	EGF	down	0	0	0	0	0	0	0.9	0.808	0.98
PC	down	ACLY	up	0.043	0	0	0	0.086	0	0.9	0.801	0.98
ALB	down	CP	up	0	0	0	0	0.171	0	0.9	0.788	0.98
NUSAP1	up	ASPM	up	0	0	0	0	0.975	0	0	0.22	0.98
TLR3	up	BIRC3	up	0	0	0	0	0.049	0.754	0.9	0.282	0.98
MUC13	down	MUC15	down	0	0	0	0	0	0	0.9	0.8	0.979
FN1	up	SERPINE1	up	0	0	0	0	0.295	0	0.9	0.735	0.979
CCL5	up	CCL20	up	0	0	0	0	0.133	0.219	0.9	0.738	0.979
ALB	down	SERPINE1	up	0	0	0	0	0.077	0	0.9	0.795	0.979
PC	down	PCK1	down	0	0	0	0	0.064	0	0.9	0.794	0.979
FBLN5	down	LOX	up	0	0	0	0	0.167	0.363	0.9	0.658	0.979
BTK	up	VAV1	up	0	0	0	0.547	0.451	0.467	0.9	0.799	0.979
TRIM22	up	GBP1	up	0	0	0	0	0.711	0	0.9	0.33	0.978
PLG	down	ALB	down	0	0	0	0	0.257	0	0.9	0.737	0.978
PFKP	up	ALDOC	up	0	0	0	0	0.215	0	0.9	0.747	0.978
HLA-DQB1	up	HLA-DMA	up	0	0	0	0	0.337	0.195	0.9	0.641	0.978
EGF	down	SERPINE1	up	0	0	0	0	0	0	0.9	0.798	0.978
VWF	up	SERPINE1	up	0	0	0	0	0	0	0.9	0.796	0.978
ACAT1	down	OXCT1	down	0.093	0.053	0	0	0.081	0	0.9	0.767	0.978
SHMT2	up	FTCD	down	0.163	0	0	0	0.062	0	0.9	0.744	0.977
HLA-DPB1	up	HLA-DMA	up	0	0	0	0	0.244	0.195	0.9	0.674	0.977
NDUFA4	down	UQCRFS1	down	0	0	0	0	0.557	0.187	0.9	0.439	0.977
ITGB2	up	CD53	up	0	0	0	0	0.671	0	0.9	0.348	0.976
NUSAP1	up	CEP55	up	0	0	0	0	0.957	0	0	0.474	0.976
ITGA4	up	FN1	up	0	0	0	0	0.051	0.379	0.9	0.642	0.976
CXCL12	down	CXCL10	up	0	0	0	0	0	0.221	0.9	0.725	0.976
ACADM	down	ACAA1	down	0.055	0	0	0	0.162	0	0.9	0.73	0.975
HLA-DPB1	up	CD74	up	0	0	0	0	0.35	0.411	0.9	0.424	0.975
CCL20	up	CXCL10	up	0	0	0	0	0.143	0	0.9	0.733	0.975
HADH	down	ACADM	down	0.071	0	0.374	0	0.298	0	0.8	0.743	0.975
PFKP	up	ALDOB	down	0	0	0	0	0.188	0	0.9	0.717	0.975
IGFBP3	up	PLG	down	0	0	0	0	0	0.379	0.9	0.64	0.975
EGF	down	TIMP1	up	0	0	0	0	0	0	0.9	0.75	0.974
SERPINE1	up	TIMP1	up	0	0	0	0	0.174	0	0.9	0.712	0.974
APOC1	up	APOB	up	0	0	0	0	0.098	0	0.9	0.725	0.973
CD8A	up	CD3D	up	0	0	0	0	0.383	0.379	0.9	0.389	0.973
VEGFA	up	KNG1	down	0	0	0	0	0	0	0.9	0.743	0.973
ACAA1	down	PHYH	down	0	0	0	0	0.063	0	0.9	0.735	0.973
ANK2	down	SCN4B	up	0	0	0	0	0.192	0	0.9	0.703	0.973
TOP2A	up	ASPM	up	0	0	0	0	0.967	0	0	0.234	0.973
APOB	up	APOH	down	0	0	0	0	0.812	0	0.72	0.541	0.973
ALB	down	VWF	up	0	0	0	0	0	0	0.9	0.746	0.973
ALOX5	up	PTGS1	up	0	0	0	0	0.095	0	0.9	0.728	0.973
VEGFA	up	TIMP1	up	0	0	0	0	0.084	0	0.9	0.731	0.973
CXCL12	down	CXCL9	up	0	0	0	0	0.065	0.221	0.9	0.681	0.973
ITGB2	up	FCER1G	up	0	0	0	0	0.662	0	0.9	0.291	0.973
CAV1	up	EGF	down	0	0	0	0	0	0	0.9	0.746	0.973
S100A10	up	PLG	down	0	0	0	0	0	0.379	0.9	0.599	0.972
LCP1	up	FSCN1	up	0	0	0	0	0.066	0	0.9	0.732	0.972
FN1	up	TIMP1	up	0	0	0	0	0.11	0	0.9	0.712	0.972
SERPINA1	up	PLG	down	0	0	0	0	0.177	0.129	0.9	0.656	0.972
ATP6V0E2	down	ATP6V0D2	down	0	0	0	0	0.114	0.293	0.9	0.617	0.972
HMGCS2	down	ACAA1	down	0.093	0	0	0	0.143	0.37	0.9	0.517	0.972
ALB	down	C3	up	0	0	0	0	0.143	0	0.9	0.704	0.972
CXCL9	up	CCL20	up	0	0	0	0	0.097	0	0.9	0.705	0.971
RUNX3	up	CCND1	up	0	0	0	0	0	0.305	0.9	0.624	0.971
HADH	down	ALDH6A1	down	0	0.006	0	0	0.667	0	0.9	0.206	0.971
KNG1	down	HRG	down	0	0	0	0	0.257	0	0.9	0.641	0.971
EDN1	up	KNG1	down	0	0	0	0	0	0	0.9	0.731	0.971
ALB	down	KNG1	down	0	0	0	0	0.202	0	0.9	0.67	0.971
CD247	up	IL2RB	up	0	0	0	0	0.638	0	0.9	0.267	0.971
EGF	down	KNG1	down	0	0	0	0	0	0	0.9	0.714	0.97
FN1	up	VCAN	up	0	0	0	0	0.097	0	0.9	0.694	0.97
FECH	down	HMOX1	up	0	0	0	0	0	0	0.9	0.708	0.969
MUC13	down	MUC1	down	0	0	0	0	0.071	0	0.9	0.703	0.969
PLG	down	TIMP1	up	0	0	0	0	0	0	0.9	0.708	0.969
COL4A1	up	COL5A2	up	0	0	0.43	0.699	0.581	0	0.9	0.68	0.969
MUC1	down	MUC15	down	0	0	0	0	0	0	0.9	0.711	0.969
KNG1	down	SERPINE1	up	0	0	0	0	0.055	0	0.9	0.703	0.969
ACADM	down	ECHS1	down	0.048	0	0.224	0	0.189	0.085	0.9	0.551	0.969
SERPINA5	down	PROC	down	0	0	0	0	0.177	0.435	0.9	0.416	0.969
HLA-DQB2	up	HLA-DMA	up	0	0	0	0	0.309	0.195	0.9	0.52	0.969
COL4A1	up	COL1A1	up	0	0	0.407	0.706	0.575	0	0.9	0.758	0.969
CXCR4	up	EDN1	up	0	0	0	0	0	0.157	0.9	0.667	0.969
HLA-G	up	HLA-B	up	0	0	0	0.98	0.076	0.689	0.9	0.721	0.969
HLA-G	up	HLA-E	up	0	0	0	0.978	0.073	0.692	0.9	0.913	0.969
HLA-E	up	HLA-F	up	0	0	0	0.972	0.141	0.663	0.9	0.792	0.969
VEGFA	up	PLG	down	0	0	0	0	0	0	0.9	0.708	0.969
LDHA	up	LDHD	down	0.053	0	0	0	0.062	0	0.9	0.701	0.969
CYP8B1	down	HSD3B7	up	0	0	0	0	0.078	0.268	0.9	0.594	0.968
C7	down	C5	down	0	0	0	0	0.062	0.379	0.9	0.518	0.968
DDC	down	MAOA	down	0	0	0	0	0.087	0	0.9	0.682	0.968
LUM	down	COL1A1	up	0	0	0	0	0.764	0.082	0.72	0.535	0.968
VEGFA	up	SPARC	up	0	0	0	0	0	0.379	0.9	0.537	0.968
FBP1	down	ALDOB	down	0	0	0	0	0.181	0	0.9	0.634	0.967
EPHX2	down	CYP2J2	up	0.056	0	0	0	0.078	0.081	0.9	0.657	0.967
SCNN1G	down	WNK4	down	0	0	0	0	0	0	0.9	0.683	0.967
UPP2	down	TYMP	up	0	0	0	0	0.064	0	0.9	0.68	0.967
HLA-B	up	HLA-E	up	0	0	0	0.978	0.348	0.514	0.9	0.733	0.966
COL1A1	up	DCN	down	0	0	0	0	0.868	0.405	0	0.61	0.966
ACADSB	down	ACAA1	down	0.055	0	0	0	0.17	0	0.9	0.623	0.966
ATP6V0E2	down	ATP6V0A4	down	0	0	0	0	0	0.408	0.9	0.475	0.966
HLA-DRA	up	HLA-DQB1	up	0	0	0	0.641	0.388	0.297	0.9	0.798	0.966
FN1	up	C3	up	0	0	0	0	0.095	0.264	0.9	0.558	0.966
CXCR4	up	CXCL10	up	0	0	0	0	0	0	0.9	0.669	0.965
ENTPD1	up	ENPP1	down	0	0	0	0	0.064	0.05	0.9	0.661	0.965
LDHA	up	PC	down	0.051	0	0	0	0.063	0.132	0.9	0.619	0.965
EGF	down	VWF	up	0	0	0	0	0.061	0	0.9	0.666	0.965
ITGB2	up	CYBB	up	0	0	0	0	0.577	0	0.9	0.25	0.965
HMGCS2	down	OXCT1	down	0.071	0	0	0	0.061	0	0.9	0.656	0.965
CD8A	up	IL2RB	up	0	0	0	0	0.322	0	0.9	0.527	0.965
COX4I2	up	UQCRFS1	down	0	0	0	0	0.455	0.736	0.54	0.535	0.965
TOP2A	up	MELK	up	0	0	0	0	0.935	0	0	0.474	0.964
BTK	up	FCER1G	up	0	0	0	0	0.215	0.435	0.9	0.284	0.964
ENO2	up	PGAM2	down	0.073	0	0	0	0.376	0.09	0.9	0.429	0.964
CSF1R	up	TYROBP	up	0	0	0	0	0.925	0	0	0.539	0.964
GLDC	down	AGXT2	down	0.078	0	0	0	0.081	0	0.9	0.634	0.964
SHMT2	up	AGXT	down	0.184	0	0	0	0.063	0	0.9	0.592	0.964
HLA-DPA1	up	HLA-DQB1	up	0	0	0	0.653	0.353	0.297	0.9	0.822	0.964
PLG	down	EGF	down	0	0	0	0	0	0	0.9	0.661	0.964
HLA-B	up	HLA-DMA	up	0	0	0	0	0.153	0	0.9	0.607	0.963
TLR7	up	CTSS	up	0	0	0	0	0.554	0	0.9	0.25	0.963
TOP2A	up	CEP55	up	0	0	0	0	0.937	0	0	0.439	0.963
DTL	up	DDB2	up	0	0	0	0	0.061	0	0.9	0.644	0.963
MYL3	down	MYH10	down	0	0	0	0	0.063	0.578	0.72	0.712	0.963
CP	up	C3	up	0	0	0	0	0.2	0	0.9	0.581	0.963
ARHGAP9	up	RAC2	up	0	0	0	0	0.24	0.186	0.9	0.479	0.963
SERPINA1	up	C3	up	0	0	0	0	0.16	0	0.9	0.595	0.963
PCK1	down	PPARGC1A	down	0	0	0	0	0.078	0	0.9	0.621	0.962
ALDH6A1	down	PCCB	down	0	0	0	0	0.308	0	0.9	0.502	0.962
COL5A2	up	PLOD2	up	0	0	0	0	0.179	0.17	0.9	0.519	0.962
PCCB	down	PC	down	0.217	0.046	0	0	0.063	0	0.9	0.541	0.962
PLOD2	up	COL1A1	up	0	0	0	0	0.145	0.17	0.9	0.53	0.962
COL4A2	up	COL1A1	up	0	0	0.378	0.698	0.509	0	0.9	0.628	0.962
TOP2A	up	KIAA0101	up	0	0	0	0	0.949	0	0	0.263	0.961
VAV1	up	CXCR4	up	0	0	0	0	0.107	0.379	0.9	0.381	0.961
CTH	down	BHMT	down	0.184	0	0	0	0.08	0	0.8	0.771	0.961
SCNN1A	down	WNK4	down	0	0	0	0	0.061	0	0.9	0.621	0.961
SERPINA1	up	FN1	up	0	0	0	0	0	0.264	0.9	0.517	0.961
HLA-E	up	TYROBP	up	0	0	0	0	0.153	0	0.9	0.586	0.961
S100A10	up	PLAT	down	0	0	0	0	0.062	0	0.9	0.623	0.961
PLAU	down	FN1	up	0	0	0	0	0.102	0	0.9	0.592	0.96
ACLY	up	PCK2	down	0	0	0	0	0.063	0	0.9	0.614	0.96
HLA-B	up	TAP1	up	0	0	0	0	0.213	0.348	0.9	0.319	0.96
FCER1G	up	TYROBP	up	0	0	0	0	0.888	0	0	0.659	0.96
HMGCS2	down	FABP1	down	0	0	0	0	0.25	0	0.9	0.51	0.96
ALDH6A1	down	ACADM	down	0	0	0	0	0.148	0	0.9	0.567	0.96
SH2B3	up	KIT	down	0	0	0	0	0	0.379	0.9	0.414	0.96
HLA-DMB	up	HLA-DQA1	up	0	0	0	0.636	0.36	0.268	0.9	0.626	0.96
ALDH6A1	down	ABAT	down	0	0	0	0	0.187	0	0.9	0.543	0.959
HLA-DPB1	up	HLA-DRA	up	0	0	0	0.665	0.394	0.195	0.9	0.732	0.959
ACADSB	down	ACAT1	down	0.055	0	0	0	0.441	0	0.9	0.322	0.959
BTK	up	TYROBP	up	0	0	0	0	0.368	0	0.9	0.412	0.959
VAV1	up	KIT	down	0	0	0	0	0	0.261	0.9	0.492	0.959
RDH12	down	ALDH1A2	down	0	0	0	0	0.064	0.109	0.9	0.559	0.958
GCAT	down	SHMT2	up	0.076	0	0	0	0.088	0	0.9	0.567	0.958
TYMS	up	NCAPG	up	0	0	0	0	0.95	0	0	0.194	0.958
FBP1	down	ALDOC	up	0	0	0	0	0.129	0	0.9	0.565	0.958
HLA-E	up	HLA-DMA	up	0	0	0	0	0.139	0	0.9	0.562	0.958
ACADM	down	ACAT1	down	0.055	0	0	0	0.422	0	0.9	0.326	0.958
CD36	up	FABP1	down	0	0	0	0	0.077	0	0.9	0.587	0.958
HLA-G	up	CD8A	up	0	0	0	0	0	0.522	0.9	0.203	0.958
ACO1	down	ACLY	up	0.079	0	0	0	0.113	0.134	0.9	0.504	0.958
HLA-B	up	CD8A	up	0	0	0	0	0.065	0.522	0.9	0.185	0.958
SCNN1B	down	SCNN1G	down	0	0	0	0.868	0.221	0.432	0.9	0.943	0.957
SHMT2	up	SDS	up	0	0	0	0	0.063	0	0.9	0.586	0.957
GLDC	down	AGXT	down	0	0	0	0	0.078	0	0.9	0.574	0.957
GCAT	down	GLDC	down	0	0	0	0	0.081	0	0.9	0.578	0.957
AGXT	down	DAO	down	0.13	0	0	0	0.268	0	0.9	0.411	0.957
CLDN19	down	CLDN16	down	0	0	0	0.634	0	0.379	0.9	0.952	0.957
CXCR4	up	CXCL9	up	0	0	0	0	0.065	0	0.9	0.584	0.957
HADH	down	OXCT1	down	0.167	0	0	0	0.09	0	0.9	0.496	0.956
CSPG4	up	VCAN	up	0	0	0	0	0.062	0	0.9	0.578	0.956
ATP6V0E2	down	ATP6V1C2	down	0	0	0	0	0.062	0	0.9	0.569	0.956
ENPP3	up	ENTPD1	up	0	0	0	0	0.064	0.05	0.9	0.572	0.956
CXCR4	up	CCL20	up	0	0	0	0	0	0	0.9	0.586	0.956
GABRA2	down	GPHN	down	0	0	0	0	0	0.348	0.9	0.386	0.956
ALB	down	TIMP1	up	0	0	0	0	0	0	0.9	0.587	0.956
EDN1	up	EGF	down	0	0	0	0	0	0	0.9	0.586	0.956
HLA-DPA1	up	HLA-DRA	up	0	0	0	0.957	0.56	0	0.9	0.771	0.955
IFI27	up	ISG20	up	0	0	0	0	0.062	0	0.9	0.559	0.955
PIPOX	down	ACOX2	down	0	0	0	0	0.063	0	0.9	0.56	0.955
ST3GAL6	down	FUT3	down	0	0	0	0	0	0	0.9	0.572	0.955
HACL1	down	PHYH	down	0.051	0	0	0	0.063	0	0.9	0.557	0.955
CYBB	up	CD53	up	0	0	0	0	0.488	0	0.9	0.199	0.955
SCNN1B	down	WNK4	down	0	0	0	0	0.061	0	0.9	0.562	0.955
HLA-DRA	up	HLA-DQA1	up	0	0	0	0.95	0.557	0	0.9	0.849	0.955
VEGFA	up	PGF	up	0	0	0	0.897	0	0.514	0.9	0.942	0.954
COL5A2	up	COL4A2	up	0	0	0.397	0.692	0.404	0	0.9	0.592	0.954
SERPINA1	up	KNG1	down	0	0	0	0	0.095	0	0.9	0.534	0.954
KNG1	down	C3	up	0	0	0	0	0.094	0	0.9	0.54	0.954
NNMT	up	AOX1	down	0	0	0	0	0.175	0	0.9	0.49	0.954
ATP6V0E2	down	ATP6V1B1	down	0	0	0	0	0.12	0	0.9	0.527	0.954
CD36	up	SLC27A2	down	0	0	0	0	0.05	0	0.9	0.556	0.954
PLG	down	SPARC	up	0	0	0	0	0	0.379	0.9	0.32	0.954
SCNN1A	down	SCNN1B	down	0	0	0	0.821	0.107	0.432	0.9	0.941	0.954
PRF1	up	GNLY	up	0	0	0	0	0.783	0	0	0.794	0.953
VEGFA	up	KIT	down	0	0	0	0	0	0.174	0.6	0.87	0.953
ANGPTL4	up	PPARGC1A	down	0	0	0	0	0	0	0.9	0.557	0.953
HS6ST2	down	GPC3	down	0	0	0	0	0.11	0	0.9	0.52	0.953
EPHX2	down	AGXT	down	0.228	0	0	0	0.066	0	0.9	0.432	0.953
HLA-DRA	up	HLA-E	up	0	0	0	0	0.175	0	0.9	0.487	0.953
ACOX2	down	SLC27A2	down	0	0	0	0	0.065	0	0.9	0.538	0.953
PIPOX	down	DAO	down	0	0	0	0	0.063	0	0.9	0.541	0.953
MELK	up	NCAPG	up	0	0	0	0	0.925	0	0	0.4	0.953
FN1	up	LAMC1	up	0	0	0	0	0.222	0	0.9	0.44	0.952
VEGFA	up	ANGPT2	up	0	0	0	0	0	0.294	0	0.935	0.952
APLN	up	CXCR4	up	0	0	0	0	0	0	0.9	0.54	0.952
CTSS	up	LYZ	up	0	0	0	0	0.484	0	0.9	0.156	0.952
HLA-DPA1	up	HLA-DMA	up	0	0	0	0.719	0.443	0	0.9	0.678	0.952
SDSL	down	SHMT2	up	0	0	0	0	0.063	0	0.9	0.532	0.952
SERPINA1	up	APOB	up	0	0	0	0	0.219	0	0.9	0.441	0.952
HAO2	down	DAO	down	0	0	0	0	0.201	0	0.9	0.458	0.952
HAO2	down	ACOX2	down	0.044	0	0	0	0.086	0	0.9	0.521	0.952
CEP55	up	ASPM	up	0	0	0	0	0.932	0	0	0.325	0.952
ITGAL	up	CD53	up	0	0	0	0	0.335	0.064	0.9	0.317	0.951
SERPINA1	up	HRG	down	0	0	0	0	0.189	0	0.9	0.444	0.951
KNG1	down	VWF	up	0	0	0	0	0	0	0.9	0.531	0.951
PLG	down	PLAT	down	0	0	0	0.756	0.056	0.379	0.9	0.953	0.951
PLAU	down	PLG	down	0	0	0	0.745	0	0.379	0.9	0.961	0.951
BMPR1B	down	CHRDL1	down	0	0	0	0	0.062	0	0.9	0.526	0.951
HLA-DPA1	up	HLA-DQB2	up	0	0	0	0.653	0.148	0.297	0.9	0.756	0.951
PCK1	down	ACLY	up	0	0	0	0	0.063	0	0.9	0.525	0.951
CP	up	HMOX1	up	0	0	0	0	0.061	0.076	0.9	0.506	0.951
PTGDS	down	PTGS1	up	0	0	0	0	0	0	0.9	0.535	0.951
CSPG4	up	DCN	down	0	0	0	0	0.137	0	0.9	0.475	0.95
CD8A	up	CD247	up	0	0	0	0	0.359	0	0.9	0.295	0.95
CD300A	up	CD53	up	0	0	0	0	0.53	0	0.9	0	0.95
TRIM22	up	GBP5	up	0	0	0	0	0.53	0	0.9	0	0.95
CTGF	down	FN1	up	0	0	0	0	0.309	0.294	0	0.905	0.95
FN1	up	KNG1	down	0	0	0	0	0.052	0	0.9	0.519	0.95
HRG	down	SERPINE1	up	0	0	0	0	0.063	0	0.9	0.515	0.95
HLA-DPB1	up	HLA-DQA1	up	0	0	0	0.644	0.174	0.195	0.9	0.897	0.95
GBP2	up	ISG20	up	0	0	0	0	0.124	0	0.9	0.479	0.95
ALB	down	SPARC	up	0	0	0	0	0	0	0.9	0.529	0.95
SLC27A2	down	PHYH	down	0	0	0	0	0.063	0	0.9	0.512	0.95
HLA-DPA1	up	HLA-E	up	0	0	0	0	0.154	0	0.9	0.456	0.95
C3	up	APOB	up	0	0	0	0	0.167	0	0.9	0.458	0.95
HLA-DQB2	up	HLA-DRA	up	0	0	0	0.66	0.162	0.297	0.9	0.679	0.95
PLG	down	C3	up	0	0	0	0	0.148	0.05	0.8	0.732	0.95
CD8A	up	HLA-E	up	0	0	0	0	0.07	0.465	0.9	0.118	0.95
ATP6V0E2	down	ATP6V1G3	down	0	0	0	0	0.14	0	0.9	0.46	0.949
IGFBP3	up	TIMP1	up	0	0	0	0	0.117	0	0.9	0.477	0.949
COL4A4	down	COL4A3	down	0	0	0.426	0.846	0.395	0	0.9	0.923	0.949
HAO2	down	GRHPR	down	0.219	0	0	0	0.148	0	0.9	0.327	0.949
ITGB2	up	CD300A	up	0	0	0	0	0.505	0	0.9	0.06	0.949
ASPM	up	MELK	up	0	0	0	0	0.923	0.064	0	0.346	0.949
SCNN1A	down	SCNN1G	down	0	0	0	0.844	0.064	0.432	0.9	0.833	0.949
CYBB	up	ITGAL	up	0	0	0	0	0.458	0	0.9	0.138	0.949
COL1A1	up	PLOD3	up	0	0	0	0	0.095	0.17	0.9	0.408	0.949
CD300A	up	FCER1G	up	0	0	0	0	0.335	0.129	0.9	0.237	0.949
CP	up	APOB	up	0	0	0	0	0.15	0	0.9	0.448	0.949
IGFBP3	up	ALB	down	0	0	0	0	0.098	0	0.9	0.473	0.948
GPC3	down	ALB	down	0	0	0	0	0.214	0	0.9	0.399	0.948
HLA-DPB1	up	HLA-DMB	up	0	0	0	0.677	0.38	0	0.9	0.66	0.948
SPTBN2	down	ANK2	down	0	0	0	0	0.105	0.186	0.9	0.377	0.948
COL4A1	up	PLOD2	up	0	0	0	0	0.169	0.185	0.9	0.329	0.948
DACH1	down	EYA4	down	0	0	0	0	0	0.661	0	0.854	0.948
VAV1	up	CD247	up	0	0	0	0	0.124	0.267	0.9	0.291	0.948
INHBB	up	FSTL3	up	0	0	0	0	0.077	0.185	0.9	0.385	0.947
ITGB2	up	FCGR2A	up	0	0	0	0	0.327	0	0.9	0.287	0.947
SPARC	up	TIMP1	up	0	0	0	0	0.119	0	0.9	0.447	0.947
FN1	up	FSTL3	up	0	0	0	0	0.098	0.379	0.9	0.172	0.947
AGXT	down	SDS	up	0.147	0	0	0	0.096	0.058	0.9	0.392	0.947
FYB	up	CD3D	up	0	0	0	0	0.356	0	0.9	0.245	0.947
FCER1G	up	CD53	up	0	0	0	0	0.346	0	0.9	0.255	0.947
VAV1	up	NCKAP1L	up	0	0	0	0	0.368	0	0.9	0.237	0.947
TNFRSF1B	up	ITGAL	up	0	0	0	0	0.2	0	0.9	0.398	0.947
C3	up	C5	down	0	0	0	0.754	0.063	0.379	0.9	0.73	0.947
TNFRSF1B	up	TNFSF13B	up	0	0	0	0	0.092	0	0.9	0.473	0.947
VWF	up	TIMP1	up	0	0	0	0	0.062	0	0.9	0.481	0.947
ALB	down	PROC	down	0	0	0	0	0.323	0	0.9	0.287	0.947
EGF	down	SPARC	up	0	0	0	0	0.061	0	0.9	0.473	0.946
ALB	down	HRG	down	0	0	0	0	0.177	0	0.9	0.403	0.946
VCAN	up	TIMP1	up	0	0	0	0	0.064	0	0.9	0.476	0.946
HLA-B	up	TYROBP	up	0	0	0	0	0.142	0	0.9	0.415	0.945
CD3D	up	IL2RB	up	0	0	0	0	0.312	0	0.9	0.268	0.945
CEP55	up	NCAPG	up	0	0	0	0	0.923	0	0	0.318	0.945
CALB1	down	PVALB	down	0	0	0	0	0.106	0	0	0.941	0.945
HADH	down	HIBCH	down	0.072	0	0	0	0.227	0	0.9	0.334	0.945
HLA-DRA	up	CTSS	up	0	0	0	0	0.277	0	0.9	0.309	0.945
HLA-DMB	up	HLA-DQB1	up	0	0	0	0.664	0.346	0	0.9	0.618	0.945
KLHL3	down	WNK4	down	0	0	0	0	0	0.379	0	0.913	0.944
ITGB2	up	C3	up	0	0	0	0	0.063	0.294	0.9	0.255	0.944
TNFRSF1B	up	BIRC3	up	0	0	0	0	0.105	0	0.9	0.431	0.944
IFI16	up	PYCARD	up	0	0	0	0	0.088	0.376	0.8	0.567	0.944
HAO2	down	HACL1	down	0.142	0	0	0	0.064	0	0.9	0.393	0.944
GPC5	down	DCN	down	0	0	0	0	0.061	0.064	0.9	0.44	0.944
PHKA2	up	PYGL	up	0	0	0	0	0.065	0	0.9	0.45	0.944
CTH	down	SDS	up	0.165	0	0	0	0.081	0	0.8	0.68	0.944
FBP1	down	PFKP	up	0.135	0	0	0	0.061	0.07	0.8	0.687	0.944
CP	up	PROC	down	0	0	0	0	0.111	0.379	0.9	0.09	0.943
VAV1	up	FCER1G	up	0	0	0	0	0.208	0.15	0.9	0.255	0.943
TOP2A	up	TYMS	up	0.112	0	0	0	0.83	0	0	0.653	0.943
SLIT2	down	CXCL12	down	0	0	0	0	0.12	0	0.9	0.412	0.943
AOX1	down	AGXT2	down	0	0	0	0	0.064	0	0.9	0.444	0.943
FABP1	down	PLIN2	up	0	0	0	0	0.061	0	0.9	0.451	0.943
CASR	down	LPAR5	up	0	0	0	0	0	0	0.9	0.455	0.943
ACADM	down	FABP1	down	0	0	0	0	0.061	0	0.9	0.445	0.943
GPC3	down	DCN	down	0	0	0	0	0.061	0.064	0.9	0.429	0.943
COL4A2	up	PLOD2	up	0	0	0	0	0.158	0.185	0.9	0.278	0.943
BNIP3	up	GABARAPL1	down	0	0	0	0	0.14	0	0.8	0.698	0.943
ABAT	down	ALDH1B1	down	0.053	0	0	0	0.113	0.126	0.9	0.337	0.942
CD36	up	APOB	up	0	0	0	0	0.061	0	0.9	0.435	0.942
CEP55	up	MELK	up	0	0	0	0	0.909	0	0	0.389	0.942
MYL3	down	TNNC1	down	0	0	0.369	0.778	0.325	0	0.9	0.56	0.942
GATA3	down	CCND1	up	0	0	0	0	0.062	0	0.9	0.434	0.942
ITGB2	up	KNG1	down	0	0	0	0	0.061	0.379	0.9	0.123	0.942
CXCL12	down	EDN1	up	0	0	0	0	0	0	0.9	0.446	0.942
PCCB	down	ACADM	down	0.071	0	0	0	0.108	0	0.9	0.387	0.942
TAP1	up	HLA-F	up	0	0	0	0	0.122	0.294	0.9	0.183	0.942
PTPRD	down	PPFIA4	up	0	0	0	0	0.098	0.26	0.9	0.244	0.942
KNG1	down	CP	up	0	0	0	0	0.108	0	0.9	0.408	0.942
COL4A2	up	LUM	down	0	0	0	0	0.298	0.082	0.9	0.209	0.942
NNMT	up	S100A10	up	0	0	0	0	0.941	0	0	0.06	0.942
HADH	down	HMGCS2	down	0	0	0	0	0.061	0	0.9	0.433	0.942
HLA-G	up	TAP1	up	0	0	0	0	0.065	0.379	0.9	0.13	0.942
FECH	down	CP	up	0	0	0	0	0	0	0.9	0.44	0.941
CYBB	up	FCER1G	up	0	0	0	0	0.366	0	0.9	0.151	0.941
FN1	up	HRG	down	0	0	0	0	0	0.098	0.9	0.404	0.941
GPC5	down	VCAN	up	0	0	0	0	0	0	0.9	0.44	0.941
LUM	down	DCN	down	0	0	0.445	0.736	0.914	0	0	0.894	0.941
CYP2J2	up	CYP4F3	down	0	0	0.442	0.602	0.062	0	0.9	0.707	0.941
FBP1	down	HK2	up	0	0	0	0	0.049	0	0.9	0.438	0.941
CYP2J2	up	CYP4A11	down	0	0	0.435	0.608	0.062	0	0.9	0.73	0.941
VWF	up	SPARC	up	0	0	0	0	0.118	0	0.9	0.391	0.941
HLA-E	up	HLA-DQA1	up	0	0	0	0	0	0	0.9	0.429	0.94
SERPINA1	up	TIMP1	up	0	0	0	0	0.095	0	0.9	0.399	0.94
BMPR1B	down	SOSTDC1	down	0	0	0	0	0	0	0.9	0.424	0.94
HLA-DQA1	up	ICAM1	up	0	0	0	0	0.061	0	0.9	0.415	0.94
GPC3	down	VCAN	up	0	0	0	0	0.065	0	0.9	0.416	0.94
AUH	down	HMGCS2	down	0.072	0	0	0	0.061	0	0.9	0.393	0.94
ADORA3	up	KNG1	down	0	0	0	0	0	0	0.9	0.428	0.94
G6PC	down	PCK2	down	0	0	0	0	0.081	0	0	0.936	0.939
HACL1	down	AGXT	down	0.219	0	0	0	0.077	0	0.9	0.261	0.939
KIT	down	PTPRO	down	0	0	0	0	0	0.413	0.9	0.058	0.939
HLA-B	up	HLA-DPA1	up	0	0	0	0.6	0.213	0	0.9	0.674	0.939
CD36	up	PPARGC1A	down	0	0	0	0	0	0	0.9	0.422	0.939
HLA-DRA	up	RGS1	up	0	0	0	0	0.333	0	0.9	0.162	0.939
ALOX5	up	CYP4F3	down	0	0	0	0	0	0	0.9	0.42	0.939
ENO2	up	PCK1	down	0	0	0	0	0	0	0.9	0.417	0.939
HLA-G	up	HLA-DQA1	up	0	0	0	0	0	0	0.9	0.424	0.939
ITGA4	up	ITGAL	up	0	0	0	0.602	0.132	0	0.9	0.837	0.939
ITGB2	up	TNFRSF1B	up	0	0	0	0	0.287	0	0.9	0.213	0.939
FN1	up	CP	up	0	0	0	0	0.082	0	0.9	0.39	0.939
FN1	up	APOB	up	0	0	0	0	0.086	0	0.9	0.381	0.938
ECHS1	down	HIBCH	down	0	0	0.371	0.694	0.129	0	0.9	0.786	0.938
COL4A1	up	PLOD3	up	0	0	0	0	0.062	0.185	0.9	0.291	0.938
PCCB	down	ACAA1	down	0.093	0	0	0	0.114	0	0.9	0.328	0.938
FYB	up	CD247	up	0	0	0	0	0.328	0	0.9	0.157	0.938
GNLY	up	GZMB	up	0	0	0	0	0.797	0	0	0.707	0.938
TLR7	up	TLR3	up	0	0	0	0.6	0.063	0	0.9	0.938	0.938
SERPINA1	up	VWF	up	0	0	0	0	0	0	0.9	0.399	0.937
TREM2	up	SEMA6D	down	0	0	0	0	0	0	0.9	0.397	0.937
AOX1	down	MAOA	down	0	0	0	0	0.096	0	0.9	0.364	0.937
TUBAL3	down	TUBB2B	down	0	0	0	0.906	0.129	0.317	0.9	0.402	0.937
VAV1	up	CXCL12	down	0	0	0	0	0	0	0.9	0.4	0.937
LAMC1	up	LAMA4	up	0	0	0	0.55	0.116	0	0.9	0.718	0.937
SHMT2	up	DAO	down	0.124	0	0	0	0.061	0	0.9	0.326	0.937
ABCA1	up	FABP1	down	0	0	0	0	0.06	0	0.9	0.39	0.937
ALDH6A1	down	AGXT2	down	0	0.037	0	0	0.07	0	0.9	0.385	0.937
GPC3	down	APOB	up	0	0	0	0	0.312	0.133	0.9	0.071	0.937
GBP1	up	GBP2	up	0	0	0	0.979	0.784	0.719	0	0.903	0.937
TNFSF13B	up	BIRC3	up	0	0	0	0	0.087	0	0.9	0.36	0.936
HLA-DPA1	up	HLA-DQA1	up	0	0	0	0.953	0.363	0	0.9	0.832	0.936
HLA-DRA	up	CD3D	up	0	0	0	0	0.097	0	0.9	0.354	0.936
SERPINA4	down	APOH	down	0	0	0	0	0.363	0	0.9	0.086	0.936
IFI27	up	GBP2	up	0	0	0	0	0.102	0	0.9	0.348	0.936
SLIT2	down	CXCR4	up	0	0	0	0	0.063	0	0.9	0.376	0.936
PTGER1	down	KNG1	down	0	0	0	0	0	0	0.9	0.388	0.936
NUSAP1	up	MELK	up	0	0	0	0	0.873	0	0	0.52	0.936
VWF	up	PROC	down	0	0	0	0	0	0	0.9	0.392	0.936
HADH	down	PCCB	down	0.051	0	0	0	0.598	0	0.8	0.264	0.936
FN1	up	LGALS1	up	0	0	0	0	0.11	0.08	0.9	0.315	0.936
HLA-B	up	HLA-DRA	up	0	0	0	0.611	0.213	0	0.9	0.593	0.936
GCGR	down	ADCY7	up	0	0	0	0	0	0.092	0.9	0.361	0.936
LYZ	up	C3	up	0	0	0	0	0.097	0	0.9	0.356	0.936
FYB	up	SIRPA	up	0	0	0	0	0.093	0	0.9	0.354	0.936
HLA-E	up	ICAM1	up	0	0	0	0	0.102	0	0.9	0.354	0.936
SIRPA	up	CD300A	up	0	0	0	0	0.097	0	0.9	0.356	0.936
ENO2	up	PCK2	down	0	0	0	0	0	0	0.9	0.384	0.935
ALB	down	VCAN	up	0	0	0	0	0	0	0.9	0.384	0.935
CHRDL1	down	FSTL3	up	0	0	0	0	0	0	0.9	0.381	0.935
CXCL12	down	CCL28	up	0	0	0	0	0	0.221	0.9	0.243	0.935
CYBB	up	CD300A	up	0	0	0	0	0.383	0	0.9	0.041	0.935
HLA-B	up	GBP1	up	0	0	0	0	0.213	0	0.9	0.243	0.935
CASR	down	GCGR	down	0	0	0	0	0.085	0	0.9	0.346	0.935
CHST15	up	VCAN	up	0	0	0	0	0	0	0.9	0.386	0.935
SEMA6D	down	TYROBP	up	0	0	0	0	0	0	0.9	0.381	0.935
VAV1	up	CYBB	up	0	0	0	0	0.213	0	0.9	0.251	0.935
TIMP1	up	LGALS1	up	0	0	0	0	0.304	0	0.9	0.146	0.935
HLA-B	up	HLA-DQB1	up	0	0	0	0.629	0.096	0	0.9	0.847	0.935
SHMT2	up	PIPOX	down	0.124	0	0	0	0.061	0	0.9	0.294	0.934
ALDH6A1	down	ACAT1	down	0	0	0	0	0.27	0	0.9	0.179	0.934
CXCL9	up	FPR3	up	0	0	0	0	0.312	0	0.9	0.12	0.934
HLA-DPA1	up	HLA-F	up	0	0	0	0.624	0.152	0.112	0.9	0.535	0.934
GPC3	down	FN1	up	0	0	0	0	0.078	0	0.9	0.349	0.934
HAO2	down	HOGA1	down	0.148	0	0	0	0.15	0	0.9	0.203	0.934
ERBB4	down	EGF	down	0	0	0	0	0.177	0.078	0.6	0.809	0.934
COL4A2	up	PLOD3	up	0	0	0	0	0.095	0.185	0.9	0.22	0.934
HLA-DQB1	up	CTSS	up	0	0	0	0	0.233	0	0.9	0.21	0.934
CCL5	up	C3	up	0	0	0	0	0.063	0	0.9	0.356	0.934
SPARC	up	SERPINE1	up	0	0	0	0	0.125	0	0.9	0.312	0.934
VEGFA	up	SERPINA1	up	0	0	0	0	0.084	0	0.9	0.331	0.933
SH3GL2	down	EGF	down	0	0	0	0	0.062	0	0.9	0.349	0.933
GBP5	up	FCGR1B	up	0	0	0	0	0.124	0	0.9	0.296	0.933
CXCR4	up	ADORA3	up	0	0	0	0	0.064	0	0.9	0.348	0.933
COL4A2	up	COL5A3	up	0	0	0.398	0.658	0.12	0	0.9	0.523	0.933
COL5A2	up	COL8A1	up	0	0	0.44	0.712	0.145	0	0.9	0.557	0.933
CTGF	down	TGFBR3	down	0	0	0	0	0.061	0	0.9	0.345	0.933
COL8A1	up	COL1A1	up	0	0	0.433	0.708	0.16	0	0.9	0.482	0.933
EGF	down	APOB	up	0	0	0	0	0.061	0.085	0.9	0.313	0.933
ACOX2	down	AGXT	down	0	0	0	0	0.083	0	0.9	0.336	0.933
DTL	up	NCAPG	up	0	0	0	0	0.93	0	0	0.081	0.933
HLA-DPB1	up	HLA-B	up	0	0	0	0.639	0.111	0	0.9	0.799	0.933
TRIM22	up	GBP2	up	0	0	0	0	0.351	0	0.9	0.051	0.933
HRG	down	PLAT	down	0	0	0	0	0.061	0	0.9	0.35	0.933
KNG1	down	APOB	up	0	0	0	0	0.112	0	0.9	0.312	0.933
ADORA3	up	FPR3	up	0	0	0	0	0.25	0	0.9	0.188	0.933
ALDH6A1	down	ACAA1	down	0	0	0	0	0.189	0	0.9	0.246	0.933
HLA-G	up	ICAM1	up	0	0	0	0	0	0	0.9	0.35	0.932
TNFRSF1B	up	CD53	up	0	0	0	0	0.28	0	0.9	0.133	0.932
IGFBP3	up	STC2	up	0	0	0	0	0.156	0	0.9	0.263	0.932
NUSAP1	up	KIAA0101	up	0	0	0	0	0.891	0	0	0.408	0.932
COL5A2	up	LUM	down	0	0	0	0	0.613	0.082	0.72	0.399	0.932
CASP1	up	ARHGDIB	up	0	0	0	0	0.321	0.063	0.9	0.064	0.932
C1QA	up	TYROBP	up	0	0	0	0	0.897	0	0	0.363	0.932
ACAA1	down	ACAT1	down	0	0	0.447	0.767	0.09	0	0.9	0.897	0.932
ALOX5	up	CYP2J2	up	0	0	0	0	0	0	0.9	0.348	0.932
HACL1	down	PIPOX	down	0	0	0	0	0.063	0	0.9	0.333	0.932
CYBB	up	TNFRSF1B	up	0	0	0	0	0.198	0	0.9	0.224	0.932
ASS1	down	OAT	down	0.295	0	0	0	0.347	0	0	0.865	0.932
APBB1IP	up	FN1	up	0	0	0	0	0	0	0.9	0.348	0.932
NMB	up	KNG1	down	0	0	0	0	0	0	0.9	0.357	0.932
APLN	up	KNG1	down	0	0	0	0	0	0	0.9	0.347	0.931
COL4A2	up	COL8A1	up	0	0	0.392	0.683	0.098	0	0.9	0.584	0.931
VEGFA	up	HRG	down	0	0	0	0	0.061	0	0.9	0.33	0.931
ALDH6A1	down	ALDH1B1	down	0	0	0.344	0.76	0.16	0	0.9	0.663	0.931
SERPINA1	up	PROC	down	0	0	0	0	0.205	0.129	0.9	0.133	0.931
HS6ST2	down	GPC5	down	0	0	0	0	0.065	0	0.9	0.323	0.931
PC	down	LDHD	down	0	0	0	0	0.13	0	0.9	0.277	0.931
RUNX3	up	ITGAL	up	0	0	0	0	0.163	0	0.9	0.244	0.931
CXCL10	up	C3	up	0	0	0	0	0.088	0	0.9	0.312	0.931
LAMC1	up	LGALS1	up	0	0	0	0	0.096	0	0.9	0.296	0.93
SERPINA1	up	EGF	down	0	0	0	0	0	0	0.9	0.331	0.93
SHMT2	up	AGXT2	down	0.048	0	0	0	0.061	0	0.9	0.31	0.93
CTSS	up	HLA-DQA1	up	0	0	0	0	0.202	0	0.9	0.195	0.93
GBP1	up	ICAM1	up	0	0	0	0	0.146	0	0.9	0.246	0.93
VAV1	up	ITGB2	up	0	0	0	0	0.309	0.305	0.8	0.36	0.93
FABP1	down	PPARGC1A	down	0	0	0	0	0.065	0	0.9	0.312	0.93
COL4A6	down	COL5A2	up	0	0	0.433	0.688	0.095	0	0.9	0.519	0.93
COL4A1	up	COL8A1	up	0	0	0.423	0.721	0.116	0	0.9	0.574	0.93
COL4A1	up	COL5A3	up	0	0	0.412	0.691	0.115	0	0.9	0.484	0.93
VAV1	up	AXL	up	0	0	0	0	0.061	0.177	0.9	0.21	0.93
EDN1	up	PTGER1	down	0	0	0	0	0	0.157	0.9	0.245	0.93
VAV1	up	FCGR2A	up	0	0	0	0	0.127	0	0.9	0.265	0.93
VAV1	up	CDH5	up	0	0	0	0	0	0.08	0.9	0.299	0.929
HACL1	down	ACOX2	down	0	0	0	0	0.098	0	0.9	0.281	0.929
PLAU	down	ITGA5	up	0	0	0	0	0.18	0	0.9	0.212	0.929
ADCY7	up	ADORA3	up	0	0	0	0	0.063	0.06	0.9	0.296	0.929
BDKRB2	down	EDN1	up	0	0	0	0	0.083	0	0.9	0.292	0.929
HLA-B	up	ICAM1	up	0	0	0	0	0.102	0	0.9	0.28	0.929
CASR	down	CXCR4	up	0	0	0	0	0	0.057	0.9	0.31	0.929
CASR	down	EDN1	up	0	0	0	0	0	0	0.9	0.32	0.929
HLA-DPB1	up	HLA-E	up	0	0	0	0.63	0.11	0.112	0.9	0.499	0.929
HLA-DMA	up	HLA-DQA1	up	0	0	0	0.728	0.18	0	0.9	0.677	0.929
HLA-B	up	HLA-DQA1	up	0	0	0	0.596	0	0	0.9	0.737	0.929
HLA-DRA	up	HLA-F	up	0	0	0	0.616	0.152	0	0.9	0.537	0.929
CCL5	up	CCL28	up	0	0	0	0	0.067	0.207	0.9	0.143	0.928
PROC	down	APOB	up	0	0	0	0	0.299	0.05	0.9	0.056	0.928
ABAT	down	AGXT2	down	0	0	0	0.582	0.086	0	0.9	0.607	0.928
SERPINA5	down	VWF	up	0	0	0	0	0	0	0.9	0.31	0.928
TNFRSF1B	up	PSMB9	up	0	0	0	0	0.121	0	0.9	0.252	0.928
GBP2	up	GBP5	up	0	0	0	0.966	0.644	0	0.8	0.906	0.928
ENPP6	down	ENPP2	up	0	0	0.384	0.713	0.062	0	0.9	0.643	0.928
CXCL9	up	CCL28	up	0	0	0	0	0	0.221	0.9	0.157	0.928
BTN3A2	up	BTN3A1	up	0	0	0	0.98	0.356	0.892	0	0.732	0.928
HLA-DQB1	up	HLA-F	up	0	0	0	0.612	0.144	0	0.9	0.502	0.927
CD8A	up	HLA-F	up	0	0	0	0	0.076	0.262	0.9	0.063	0.927
SDSL	down	AGXT	down	0.147	0	0	0	0.088	0.058	0.9	0.159	0.927
COL4A6	down	COL1A1	up	0	0	0.398	0.691	0.095	0	0.9	0.456	0.927
GPC3	down	CSPG4	up	0	0	0	0	0.049	0	0.9	0.298	0.927
HCLS1	up	FCER1G	up	0	0	0	0	0.306	0	0.9	0	0.927
KIT	down	EGF	down	0	0	0	0	0	0.062	0.8	0.644	0.927
HLA-DMB	up	HLA-DQB2	up	0	0	0	0.675	0.163	0	0.9	0.523	0.927
HLA-DRA	up	GBP2	up	0	0	0	0	0.193	0	0.9	0.169	0.927
VDR	down	CYP27B1	down	0	0	0	0	0.063	0.133	0	0.917	0.927
CCL28	up	CXCL10	up	0	0	0	0	0	0.221	0.9	0.146	0.927
CHST15	up	DCN	down	0	0	0	0	0.061	0	0.9	0.287	0.927
GBP2	up	ICAM1	up	0	0	0	0	0.149	0	0.9	0.22	0.927
VWF	up	HRG	down	0	0	0	0	0.06	0	0.9	0.292	0.927
PRLR	down	ERBB4	down	0	0	0	0	0	0	0.9	0.304	0.927
ITGB2	up	ITGA5	up	0	0	0	0	0.062	0.382	0.72	0.607	0.927
PDGFD	up	PLG	down	0	0	0	0	0	0	0.9	0.3	0.927
COL5A2	up	COL5A3	up	0	0	0.441	0.825	0.143	0	0.9	0.751	0.927
GPC5	down	CSPG4	up	0	0	0	0	0.049	0	0.9	0.3	0.927
COL5A3	up	COL8A1	up	0	0	0.431	0.715	0.062	0	0.9	0.541	0.926
HLA-DPB1	up	HLA-DQB1	up	0	0	0	0.962	0.273	0	0.9	0.894	0.926
TYROBP	up	SPI1	up	0	0	0	0	0.799	0	0	0.647	0.926
COL4A3	down	COL1A1	up	0	0	0.422	0.709	0	0	0.9	0.584	0.926
EPHX2	down	PIPOX	down	0.178	0	0	0	0.064	0	0.9	0.153	0.926
VAV1	up	CD3D	up	0	0	0	0	0.118	0	0.9	0.236	0.926
CXCR4	up	KNG1	down	0	0	0	0	0	0	0.9	0.291	0.926
CLDN8	down	CLDN16	down	0	0	0	0.637	0.061	0	0.9	0.699	0.926
ACADSB	down	BCKDHB	down	0	0	0	0	0.085	0.064	0.9	0.243	0.926
HLA-DPA1	up	CTSS	up	0	0	0	0	0.248	0	0.9	0.106	0.926
HLA-DPB1	up	HLA-F	up	0	0	0	0.639	0.124	0	0.9	0.558	0.926
FOLR3	down	GGH	down	0	0	0	0	0	0	0.9	0.298	0.926
CXCL12	down	ADORA3	up	0	0	0	0	0	0.162	0.9	0.194	0.926
PTHLH	up	GCGR	down	0	0	0	0	0	0	0.9	0.29	0.926
COL4A6	down	COL8A1	up	0	0	0.42	0.673	0.061	0	0.9	0.438	0.926
HLA-DPB1	up	CTSS	up	0	0	0	0	0.17	0	0.9	0.178	0.925
HLA-DRA	up	CD247	up	0	0	0	0	0.13	0	0.9	0.211	0.925
HLA-DQB1	up	CD3D	up	0	0	0	0	0.104	0	0.9	0.236	0.925
CCL5	up	KNG1	down	0	0	0	0	0	0	0.9	0.284	0.925
CXCL12	down	C3	up	0	0	0	0	0.065	0	0.9	0.267	0.925
HLA-DRA	up	ICAM1	up	0	0	0	0	0.076	0	0.9	0.254	0.925
HAO2	down	EPHX2	down	0.156	0	0	0	0.062	0	0.9	0.168	0.925
SDSL	down	CTH	down	0.165	0	0	0	0.081	0	0.8	0.572	0.925
ITGB2	up	CTGF	down	0	0	0	0	0	0	0.9	0.285	0.925
CYP1B1	down	IDO1	up	0	0	0	0	0	0	0.9	0.285	0.925
VEGFA	up	CTGF	down	0	0	0	0	0.062	0.379	0	0.881	0.925
HLA-E	up	GBP2	up	0	0	0	0	0.213	0	0.9	0.127	0.925
CXCL12	down	KNG1	down	0	0	0	0	0.061	0	0.9	0.266	0.925
IDO1	up	DDC	down	0	0	0	0	0	0	0.9	0.283	0.925
CYP27B1	down	CYP24A1	down	0	0	0.447	0.814	0.061	0	0.9	0.947	0.925
RUNX3	up	ITGA4	up	0	0	0	0	0.126	0	0.9	0.21	0.924
KNG1	down	PROC	down	0	0	0	0	0.124	0	0.9	0.205	0.924
HLA-DPA1	up	GBP2	up	0	0	0	0	0.17	0	0.9	0.161	0.924
CD1D	up	CD3D	up	0	0	0	0	0.142	0	0.9	0.189	0.924
HLA-DQB2	up	CTSS	up	0	0	0	0	0.18	0	0.9	0.147	0.924
COL4A4	down	COL5A2	up	0	0	0.408	0.714	0.061	0	0.9	0.493	0.924
EPHX2	down	DAO	down	0.178	0	0	0	0.061	0	0.9	0.137	0.924
HLA-DRA	up	GBP1	up	0	0	0	0	0.137	0	0.9	0.193	0.924
COL4A4	down	COL8A1	up	0	0	0.417	0.701	0.061	0	0.9	0.459	0.924
NCKAP1L	up	FCGR2A	up	0	0	0	0	0.272	0	0.9	0	0.924
HLA-DPB1	up	CD3D	up	0	0	0	0	0.103	0	0.9	0.229	0.924
CLDN10	down	CLDN16	down	0	0	0	0.635	0	0	0.9	0.694	0.924
CASR	down	C3	up	0	0	0	0	0	0	0.9	0.262	0.923
BTK	up	TREM2	up	0	0	0	0	0.095	0	0.9	0.227	0.923
COL4A6	down	COL5A3	up	0	0	0.405	0.654	0	0	0.9	0.385	0.923
AGXT	down	SLC27A2	down	0	0	0	0	0.129	0	0.9	0.189	0.923
COL4A6	down	PLOD2	up	0	0	0	0	0.1	0.185	0.9	0.085	0.923
GZMA	up	GNLY	up	0	0	0	0	0.778	0	0	0.669	0.923
GPT2	down	AGXT	down	0.111	0	0	0	0.246	0.112	0.8	0.455	0.923
CYP4A11	down	FABP1	down	0	0	0	0	0.096	0	0.9	0.224	0.923
ABCG1	up	SCARB1	up	0	0	0	0	0.061	0	0	0.92	0.923
KNG1	down	C5	down	0	0	0	0	0.064	0	0.9	0.25	0.923
TYMP	up	TYMS	up	0.295	0	0	0	0	0	0	0.895	0.923
BDKRB2	down	PTGER1	down	0	0	0	0	0.066	0	0.9	0.244	0.923
ALDH1B1	down	BBOX1	down	0	0	0	0	0.073	0.111	0.9	0.177	0.923
ALDH1B1	down	MAOA	down	0	0	0	0	0	0	0.9	0.269	0.923
PTHLH	up	ADM	up	0	0	0	0	0	0	0.9	0.265	0.923
FABP5	up	ACLY	up	0	0	0	0	0.062	0	0.9	0.249	0.923
AGPAT9	down	GPD1	down	0.07	0	0	0	0.062	0.046	0.9	0.218	0.923
HLA-B	up	HLA-DMB	up	0	0	0	0.63	0.142	0	0.9	0.388	0.922
LHPP	down	ATP12A	down	0	0	0	0	0.048	0	0.9	0.251	0.922
ARHGAP22	up	RAC2	up	0	0	0	0	0.062	0.189	0.9	0.101	0.922
LAMC1	up	TIMP1	up	0	0	0	0	0.095	0	0.9	0.212	0.922
HACL1	down	DAO	down	0	0	0	0	0.049	0	0.9	0.254	0.922
CD36	up	CYBB	up	0	0	0	0	0.151	0	0.9	0.154	0.922
UHRF1	up	TOP2A	up	0.045	0	0	0	0.773	0.457	0	0.42	0.922
COL5A3	up	PLOD3	up	0	0	0	0	0.061	0.093	0.9	0.202	0.922
COL4A3	down	COL8A1	up	0	0	0.425	0.699	0	0	0.9	0.41	0.922
HLA-DQB1	up	ICAM1	up	0	0	0	0	0	0	0.9	0.257	0.922
CXCL9	up	C3	up	0	0	0	0	0.09	0	0.9	0.213	0.922
COL4A3	down	COL5A2	up	0	0	0.416	0.711	0	0	0.9	0.446	0.922
CXCL12	down	FPR3	up	0	0	0	0	0	0.162	0.9	0.145	0.922
HK2	up	SORD	down	0	0	0	0	0.079	0	0.9	0.228	0.922
CCL5	up	C5	down	0	0	0	0	0.054	0	0.9	0.243	0.922
COL4A4	down	COL1A1	up	0	0	0.387	0.733	0.061	0	0.9	0.475	0.922
FYB	up	HLA-DRA	up	0	0	0	0	0.22	0	0.9	0.081	0.922
IGFBP3	up	FSTL3	up	0	0	0	0	0.143	0	0.9	0.163	0.922
VAV1	up	CD8A	up	0	0	0	0	0.092	0	0.9	0.217	0.922
HLA-E	up	HLA-DQB1	up	0	0	0	0.628	0.107	0	0.9	0.469	0.922
HLA-DQB2	up	CD3D	up	0	0	0	0	0.086	0	0.9	0.225	0.922
COL4A4	down	COL5A3	up	0	0	0.382	0.679	0	0	0.9	0.428	0.922
RUNX3	up	PSMB9	up	0	0	0	0	0.095	0	0.9	0.21	0.922
CD247	up	PAG1	up	0	0	0	0	0	0	0.9	0.25	0.921
COL5A3	up	COL1A1	up	0	0	0.434	0.831	0.118	0	0.9	0.538	0.921
UHRF1	up	HIST1H2BK	up	0	0	0	0	0.082	0.161	0.9	0.096	0.921
CXCR4	up	C3	up	0	0	0	0	0	0	0.9	0.244	0.921
EPHX2	down	ACOX2	down	0	0	0	0	0.085	0	0.9	0.214	0.921
COL23A1	up	COL8A1	up	0	0	0.44	0.72	0	0	0.9	0.432	0.921
C3	up	TIMP1	up	0	0	0	0	0	0	0.9	0.249	0.921
KNG1	down	TIMP1	up	0	0	0	0	0	0	0.9	0.247	0.921
PIPOX	down	SLC27A2	down	0	0	0	0	0.092	0	0.9	0.2	0.921
IGFBP3	up	APOB	up	0	0	0	0	0.136	0	0.9	0.163	0.921
ADM	up	GCGR	down	0	0	0	0	0	0	0.9	0.25	0.921
HLA-DPA1	up	CD3D	up	0	0	0	0	0.097	0	0.9	0.2	0.921
NEDD4L	down	KLHL3	down	0	0.001	0	0	0.048	0	0.9	0.244	0.921
CYBB	up	PLAU	down	0	0	0	0	0.062	0	0.9	0.232	0.921
HADH	down	ABAT	down	0	0	0	0	0.062	0	0.9	0.229	0.921
ESRP1	down	FN1	up	0	0	0	0	0	0	0.9	0.244	0.921
CXCL12	down	PTGER1	down	0	0	0	0	0	0.162	0.9	0.143	0.921
CASR	down	CXCL12	down	0	0	0	0	0	0	0.9	0.243	0.921
APBB1IP	up	VWF	up	0	0	0	0	0.061	0	0.9	0.228	0.921
ABAT	down	CNDP1	down	0.074	0	0	0	0.107	0.086	0.9	0.118	0.921
COL5A2	up	PLOD3	up	0	0	0	0	0.082	0.17	0.9	0.09	0.921
ALDH1B1	down	AGXT2	down	0.053	0.002	0	0	0.113	0.126	0.9	0.094	0.921
PDGFD	up	PLAT	down	0	0	0	0	0.061	0	0.9	0.228	0.921
ASPM	up	DTL	up	0	0	0	0	0.92	0	0	0	0.92
SLC27A2	down	DAO	down	0	0	0	0	0.063	0	0.9	0.214	0.92
COL4A6	down	PLOD3	up	0	0	0	0	0.061	0.185	0.9	0.085	0.92
GBP4	up	HLA-DQA1	up	0	0	0	0	0.195	0	0.9	0.091	0.92
HLA-DQA1	up	HLA-F	up	0	0	0	0.606	0.088	0	0.9	0.445	0.92
CCL5	up	ADORA3	up	0	0	0	0	0	0.05	0.9	0.228	0.92
COL4A4	down	PLOD2	up	0	0	0	0	0.061	0.185	0.9	0.085	0.92
COL23A1	up	COL4A2	up	0	0	0.409	0.726	0.061	0	0.9	0.369	0.92
MARVELD2	down	MARVELD3	down	0	0	0	0	0.225	0	0	0.9	0.92
COL4A4	down	PLOD3	up	0	0	0	0	0.061	0.185	0.9	0.085	0.92
CTSS	up	IL10RA	up	0	0	0	0	0.544	0	0.8	0.198	0.92
PIPOX	down	AGXT2	down	0.074	0	0	0	0.134	0	0.9	0.131	0.92
COL23A1	up	COL5A3	up	0	0	0.423	0.739	0	0	0.9	0.444	0.92
ADORA3	up	SUCNR1	down	0	0	0	0	0.102	0	0.9	0.188	0.92
ALB	down	ABCC3	up	0	0	0	0	0.064	0	0.9	0.213	0.919
FPR3	up	CXCL10	up	0	0	0	0	0.18	0	0.9	0.093	0.919
APOB	up	TIMP1	up	0	0	0	0	0.061	0	0.9	0.21	0.919
TNFSF13B	up	PSMB9	up	0	0	0	0	0.12	0	0.9	0.162	0.919
SEMA5B	up	PLXND1	up	0	0	0	0	0.055	0.188	0	0.902	0.919
COL4A6	down	COL23A1	up	0	0	0.41	0.71	0.061	0	0.9	0.286	0.919
HLA-DMB	up	HLA-E	up	0	0	0	0.631	0.124	0	0.9	0.36	0.919
SIRPA	up	FCER1G	up	0	0	0	0	0.121	0	0.9	0.153	0.919
SERPINA1	up	SERPINE1	up	0	0	0.449	0.761	0	0	0.9	0.442	0.919
SERPINA1	up	TGFA	up	0	0	0	0	0.088	0	0.9	0.187	0.919
HLA-G	up	HLA-DQB1	up	0	0	0	0.62	0.061	0	0.9	0.497	0.919
PLOD2	up	COL8A1	up	0	0	0	0	0.104	0	0.9	0.168	0.919
HLA-DPB1	up	ICAM1	up	0	0	0	0	0	0	0.9	0.231	0.919
PHGDH	down	PGAM2	down	0	0.02	0	0	0.055	0	0.9	0.218	0.919
FBXL16	up	FBXO2	down	0	0	0	0	0.23	0	0.9	0.043	0.919
HLA-DQB2	up	GBP4	up	0	0	0	0	0.097	0	0.9	0.175	0.919
LUM	down	COL5A3	up	0	0	0	0	0.141	0.082	0.9	0.087	0.918
CCL20	up	C3	up	0	0	0	0	0.098	0	0.9	0.165	0.918
CHGB	down	FN1	up	0	0	0	0	0	0	0.9	0.214	0.918
ITGB2	up	PLAU	down	0	0	0	0	0.063	0	0.9	0.198	0.918
HLA-G	up	HLA-DPB1	up	0	0	0	0.629	0	0	0.9	0.531	0.918
HLA-B	up	GBP2	up	0	0	0	0	0.213	0	0.9	0.046	0.918
HLA-G	up	HLA-DPA1	up	0	0	0	0.594	0	0	0.9	0.483	0.918
HLA-E	up	TAP1	up	0	0	0	0	0.152	0	0.9	0.114	0.918
CTH	down	AGXT2	down	0	0	0	0	0.08	0	0.9	0.186	0.918
TRIM22	up	GBP4	up	0	0	0	0	0.206	0	0.9	0.052	0.918
PDGFD	up	PLAU	down	0	0	0	0	0	0	0.9	0.214	0.918
CHGB	down	CP	up	0	0	0	0	0	0	0.9	0.214	0.918
DCXR	down	SORD	down	0	0	0	0	0.099	0	0.9	0.171	0.918
IFI27	up	HLA-F	up	0	0	0	0	0.069	0	0.9	0.199	0.918
COL4A4	down	COL4A1	up	0	0	0.416	0.866	0.062	0	0.9	0.87	0.918
NEDD4L	down	FBXO2	down	0	0	0	0	0	0	0.9	0.22	0.918
COL4A6	down	COL4A2	up	0	0	0.407	0.908	0.134	0	0.9	0.692	0.918
ADH1C	down	AOX1	down	0	0	0	0	0.063	0	0.9	0.203	0.918
COL4A6	down	COL4A1	up	0	0	0.438	0.879	0.102	0	0.9	0.669	0.918
STC2	up	FSTL3	up	0	0	0	0	0.098	0	0.9	0.173	0.918
COL4A3	down	COL4A2	up	0	0	0.411	0.852	0.061	0	0.9	0.763	0.917
LYZ	up	PYCARD	up	0	0	0	0	0.093	0	0.9	0.164	0.917
GBP1	up	FCGR1B	up	0	0	0	0	0.097	0	0.9	0.161	0.917
SERPINA1	up	VCAN	up	0	0	0	0	0	0	0.9	0.206	0.917
NMB	up	EDN1	up	0	0	0	0	0	0	0.9	0.208	0.917
SERPINA1	up	IGFBP3	up	0	0	0	0	0.075	0	0.9	0.181	0.917
CP	up	TIMP1	up	0	0	0	0	0.064	0	0.9	0.186	0.917
LYZ	up	DOCK2	up	0	0	0	0	0.192	0	0.9	0.058	0.917
HLA-B	up	HLA-DQB2	up	0	0	0	0.639	0.061	0	0.9	0.469	0.917
IDO1	up	MAOA	down	0	0	0	0	0	0	0.9	0.211	0.917
VDR	down	CYP24A1	down	0	0	0	0	0	0.348	0	0.878	0.917
ALDH6A1	down	AOX1	down	0	0	0	0	0.088	0	0.9	0.171	0.917
VCAN	up	LAMC1	up	0	0	0	0	0.063	0	0.9	0.188	0.917
IGFBP3	up	KLK1	down	0	0	0	0	0	0	0.9	0.21	0.917
HLA-G	up	HLA-DRA	up	0	0	0	0.599	0	0	0.9	0.451	0.917
FN1	up	STC2	up	0	0	0	0	0.152	0	0.9	0.106	0.917
COL4A3	down	COL5A3	up	0	0	0.397	0.7	0	0	0.9	0.263	0.917
CDH5	up	CDH3	down	0	0	0	0.715	0	0	0.9	0.625	0.917
GCGR	down	QRFPR	up	0	0	0	0	0	0	0.9	0.211	0.917
HLA-DPA1	up	GBP1	up	0	0	0	0	0.121	0	0.9	0.136	0.917
ADORA3	up	CXCL10	up	0	0	0	0	0.07	0	0.9	0.187	0.917
IGFBP3	up	VCAN	up	0	0	0	0	0.061	0	0.9	0.193	0.917
HLA-DQB2	up	HLA-F	up	0	0	0	0.655	0.084	0	0.9	0.428	0.917
CXCL10	up	C5	down	0	0	0	0	0.05	0	0.9	0.189	0.916
STC2	up	VCAN	up	0	0	0	0	0.06	0	0.9	0.187	0.916
COL8A1	up	PLOD3	up	0	0	0	0	0.049	0	0.9	0.188	0.916
PECAM1	up	APOB	up	0	0	0	0	0	0	0.9	0.198	0.916
GZMA	up	GZMK	up	0	0	0.446	0.906	0.907	0	0	0.739	0.916
FPR3	up	C5	down	0	0	0	0	0	0	0.9	0.202	0.916
TIMP1	up	FSTL3	up	0	0	0	0	0.101	0	0.9	0.142	0.916
C3	up	PROC	down	0	0	0	0	0.11	0.05	0.9	0.13	0.916
CCL28	up	CCL20	up	0	0	0	0	0	0	0.9	0.201	0.916
COL23A1	up	COL4A1	up	0	0	0.411	0.736	0.061	0	0.9	0.217	0.916
COL4A3	down	COL4A6	down	0	0	0.419	0.858	0	0	0.9	0.8	0.916
HLA-DQB1	up	FCGR1B	up	0	0	0	0	0.105	0	0.9	0.139	0.916
GPC3	down	IGFBP3	up	0	0	0	0	0.096	0	0.9	0.155	0.916
CCL5	up	FPR3	up	0	0	0	0	0.076	0.05	0.9	0.166	0.916
HLA-E	up	GBP1	up	0	0	0	0	0.156	0	0.9	0.092	0.916
HAO2	down	SLC27A2	down	0	0	0	0	0.078	0	0.9	0.164	0.916
SLC15A4	up	SLC2A3	up	0	0	0	0	0.064	0.086	0.9	0.134	0.916
VEGFA	up	MYOF	up	0	0	0	0	0.076	0	0.9	0.164	0.916
VCAN	up	LGALS1	up	0	0	0	0	0.061	0	0.9	0.181	0.916
HADH	down	AGXT2	down	0	0	0	0	0.063	0	0.9	0.179	0.916
KLHL13	down	FBXL16	up	0	0	0	0	0.061	0	0.9	0.177	0.916
ADM	up	PTH1R	down	0	0	0	0	0	0	0.9	0.202	0.916
CDH5	up	CDH13	up	0	0	0	0.663	0.062	0	0.9	0.451	0.916
HLA-B	up	HLA-F	up	0	0	0	0.977	0.185	0	0.9	0.701	0.916
ALB	down	LGALS1	up	0	0	0	0	0	0	0.9	0.196	0.916
COL4A4	down	COL4A6	down	0	0	0.432	0.888	0.061	0	0.9	0.818	0.915
SH3GL2	down	HLA-DQA1	up	0	0	0	0	0	0	0.9	0.188	0.915
ADH6	down	AOX1	down	0	0	0	0	0.063	0	0.9	0.165	0.915
LPAR5	up	PTGER1	down	0	0	0	0	0.06	0	0.9	0.171	0.915
BDKRB2	down	ADORA3	up	0	0	0	0	0	0	0.9	0.186	0.915
MOGAT1	down	PPAPDC1A	down	0	0	0	0	0.061	0	0.9	0.173	0.915
CEP55	up	ANLN	up	0	0	0	0	0.832	0	0	0.517	0.915
SEMA6D	down	PLXND1	up	0	0	0	0	0	0.188	0	0.899	0.915
PSMB9	up	BIRC3	up	0	0	0	0	0.139	0	0.9	0.097	0.915
HK2	up	GALM	down	0	0	0	0	0.062	0	0.9	0.168	0.915
FOLR3	down	CTSS	up	0	0	0	0	0.117	0	0.9	0.114	0.915
VIM	up	TNNT2	down	0	0	0	0	0.063	0	0.9	0.167	0.915
HLA-DQB1	up	GBP4	up	0	0	0	0	0.12	0	0.9	0.119	0.915
CDH13	up	CDH6	up	0	0	0	0.659	0.06	0	0.9	0.433	0.915
IGFBP3	up	C3	up	0	0	0	0	0.091	0	0.9	0.143	0.915
GLDC	down	PIPOX	down	0	0	0	0	0.082	0	0.9	0.152	0.915
COL4A3	down	COL23A1	up	0	0	0.42	0.739	0	0	0.9	0.247	0.915
EGF	down	HRG	down	0	0	0	0	0	0	0.9	0.186	0.915
IGFBP3	up	LGALS1	up	0	0	0	0	0.098	0	0.9	0.137	0.915
GLDC	down	DAO	down	0	0	0	0	0.081	0	0.9	0.152	0.915
CXCR4	up	CCL28	up	0	0	0	0	0	0	0.9	0.186	0.915
CXCR4	up	PTGER1	down	0	0	0	0	0	0	0.9	0.193	0.915
HLA-DRA	up	GBP4	up	0	0	0	0	0.113	0	0.9	0.127	0.915
HLA-DPA1	up	ICAM1	up	0	0	0	0	0.069	0	0.9	0.162	0.915
STC2	up	LAMC1	up	0	0	0	0	0.175	0	0.9	0.058	0.915
COL4A4	down	COL23A1	up	0	0	0.385	0.75	0	0	0.9	0.298	0.915
COL23A1	up	COL1A1	up	0	0	0.426	0.76	0	0	0.9	0.29	0.915
VCAN	up	APOB	up	0	0	0	0	0	0	0.9	0.187	0.915
ALB	down	LAMC1	up	0	0	0	0	0	0	0.9	0.189	0.915
HLA-DRA	up	GBP5	up	0	0	0	0	0.125	0	0.9	0.103	0.914
ACOX2	down	DAO	down	0	0	0	0	0.061	0	0.9	0.167	0.914
COL4A4	down	COL4A2	up	0	0	0.403	0.878	0.061	0	0.9	0.743	0.914
HLA-DQB2	up	FCGR1B	up	0	0	0	0	0.063	0	0.9	0.158	0.914
GBP1	up	HLA-DQA1	up	0	0	0	0	0.063	0	0.9	0.164	0.914
TRIM22	up	HLA-DQA1	up	0	0	0	0	0.14	0	0.9	0.085	0.914
GBP1	up	HLA-F	up	0	0	0	0	0.102	0	0.9	0.125	0.914
HLA-DQA1	up	CD3D	up	0	0	0	0	0.063	0	0.9	0.163	0.914
G0S2	down	FABP1	down	0	0	0	0	0.063	0	0.9	0.159	0.914
CHSY3	up	VCAN	up	0	0	0	0	0.052	0	0.9	0.168	0.914
ALDH1B1	down	CNDP1	down	0.044	0	0	0	0	0	0.9	0.174	0.914
EDN1	up	KISS1R	up	0	0	0	0	0	0.157	0.9	0.064	0.914
HLA-DPA1	up	GBP4	up	0	0	0	0	0.107	0	0.9	0.123	0.914
ADORA3	up	LPAR5	up	0	0	0	0	0.1	0	0.9	0.124	0.914
ALOX5	up	CYP4A11	down	0	0	0	0	0	0	0.9	0.176	0.914
GALM	down	G6PC	down	0	0	0	0	0.063	0	0.9	0.161	0.914
PTHLH	up	ADCY7	up	0	0	0	0	0	0	0.9	0.181	0.914
C1QB	up	CSF1R	up	0	0	0	0	0.896	0	0	0.198	0.913
ITGB2	up	PLG	down	0	0	0	0	0.061	0	0.9	0.156	0.913
RNASET2	up	GGH	down	0	0	0	0	0.158	0	0.9	0.051	0.913
CHGB	down	ALB	down	0	0	0	0	0	0	0.9	0.169	0.913
CYBB	up	NOX4	down	0	0	0	0.874	0.061	0	0.9	0.96	0.913
GPC3	down	TIMP1	up	0	0	0	0	0	0	0.9	0.171	0.913
ACOT12	down	ACAT1	down	0.073	0	0	0	0.061	0	0.9	0.128	0.913
BDKRB2	down	C3	up	0	0	0	0	0.069	0	0.9	0.145	0.913
FN1	up	DCN	down	0	0	0	0	0.157	0.379	0	0.846	0.913
ICAM1	up	HLA-F	up	0	0	0	0	0.069	0	0.9	0.146	0.913
APLN	up	CXCL12	down	0	0	0	0	0	0	0.9	0.171	0.913
CASR	down	CCL28	up	0	0	0	0	0	0	0.9	0.172	0.913
SUCNR1	down	FPR3	up	0	0	0	0.645	0.152	0	0.9	0.111	0.913
F3	down	PLG	down	0	0	0	0	0	0.379	0	0.866	0.913
CTSS	up	TNFAIP6	up	0	0	0	0	0.085	0	0.9	0.133	0.913
HLA-B	up	CD3D	up	0	0	0	0	0.088	0	0.9	0.124	0.913
RAB37	up	RAB25	down	0	0	0.442	0.862	0.049	0.054	0.9	0.433	0.913
COL23A1	up	COL5A2	up	0	0	0.43	0.745	0.061	0	0.9	0.116	0.913
FBXL16	up	TRIM9	up	0	0	0	0	0.172	0	0.9	0	0.913
HLA-DRA	up	FCGR1B	up	0	0	0	0	0.157	0	0.9	0.057	0.913
CXCR4	up	C5	down	0	0	0	0	0	0	0.9	0.166	0.913
FGF1	down	FGF9	down	0	0	0	0.846	0.065	0	0.9	0.732	0.913
PYCARD	up	C3	up	0	0	0	0	0.061	0	0.9	0.151	0.913
SLC12A3	down	WNK4	down	0	0	0	0	0.062	0.417	0	0.853	0.913
RGS1	up	CD3D	up	0	0	0	0	0.091	0	0.9	0.128	0.913
CXCL10	up	KNG1	down	0	0	0	0	0	0	0.9	0.171	0.913
CASR	down	KNG1	down	0	0	0	0	0	0	0.9	0.172	0.913
IFI27	up	HLA-B	up	0	0	0	0	0.063	0	0.9	0.15	0.913
IRF6	down	ISG20	up	0	0	0	0	0	0	0.9	0.174	0.913
AGPAT9	down	GPD1L	down	0.07	0	0	0	0.062	0.046	0.9	0.122	0.913
MT1G	down	MT1H	down	0	0	0	0.973	0.912	0	0	0.647	0.913
ADORA3	up	CXCL9	up	0	0	0	0	0.088	0	0.9	0.122	0.912
AGPAT9	down	GK	down	0.045	0	0	0	0.062	0.05	0.9	0.128	0.912
HLA-G	up	CD3D	up	0	0	0	0	0	0	0.9	0.165	0.912
QRFPR	up	KISS1R	up	0	0	0	0.706	0	0	0.9	0.462	0.912
CASR	down	ADORA3	up	0	0	0	0	0	0.057	0.9	0.151	0.912
TGFBI	up	ITGB2	up	0	0	0	0	0.063	0	0.9	0.144	0.912
HSPA2	down	LMNB1	up	0	0	0	0	0	0	0.9	0.162	0.912
RGS1	up	CD247	up	0	0	0	0	0.109	0	0.9	0.1	0.912
GCAT	down	PIPOX	down	0.052	0	0	0	0.062	0	0.9	0.128	0.912
LAPTM5	up	SPI1	up	0	0	0	0	0.909	0	0	0.079	0.912
ADCY7	up	PTH1R	down	0	0	0	0	0.051	0.092	0.9	0.106	0.912
BDKRB2	down	APLN	up	0	0	0	0	0.06	0	0.9	0.145	0.912
IGFBP3	up	LAMC1	up	0	0	0	0	0.152	0	0.9	0.05	0.912
EPHX2	down	HACL1	down	0	0	0	0	0.062	0	0.9	0.145	0.912
CYP2J2	up	PTGS1	up	0	0	0	0	0.055	0	0.9	0.149	0.912
SIRPA	up	ITGB2	up	0	0	0	0	0.108	0	0.9	0.093	0.912
GCGR	down	PTH1R	down	0	0	0	0.806	0.063	0	0.9	0.568	0.912
HLA-G	up	HLA-DQB2	up	0	0	0	0.657	0.061	0	0.9	0.343	0.912
IFI27	up	HLA-G	up	0	0	0	0	0	0	0.9	0.162	0.912
PLAU	down	HRG	down	0	0	0	0	0	0	0.9	0.164	0.912
BDKRB2	down	ADCY7	up	0	0	0	0	0	0	0.9	0.158	0.912
CTSS	up	C1QB	up	0	0	0	0	0.848	0	0	0.444	0.912
TNFRSF1B	up	PLAU	down	0	0	0	0	0.061	0	0.9	0.14	0.912
APLN	up	CCL28	up	0	0	0	0	0	0	0.9	0.161	0.912
CD3D	up	HLA-F	up	0	0	0	0	0.07	0	0.9	0.139	0.912
HSPA2	down	NR3C2	down	0	0	0	0	0	0.109	0.9	0.101	0.912
HACL1	down	SLC27A2	down	0	0	0	0	0.064	0	0.9	0.138	0.912
HLA-DQA1	up	LAG3	up	0	0	0	0	0.061	0	0.9	0.142	0.912
GCAT	down	AGXT2	down	0	0	0	0	0.062	0	0.9	0.127	0.911
DUSP9	down	DUSP1	up	0	0	0	0.78	0	0	0.9	0.559	0.911
BDKRB2	down	C5	down	0	0	0	0	0	0	0.9	0.156	0.911
GPC5	down	APOB	up	0	0	0	0	0	0.133	0.9	0.066	0.911
LCP1	up	SPI1	up	0	0	0	0	0.551	0	0	0.81	0.911
HIST1H2BK	up	LMNB1	up	0	0	0	0	0.076	0	0.9	0.115	0.911
CASR	down	GPR4	up	0	0	0	0	0	0	0.9	0.153	0.911
CDH4	up	CDH6	up	0	0	0	0.826	0	0	0.9	0.678	0.911
COL4A3	down	PLOD2	up	0	0	0	0	0.061	0.093	0.9	0.088	0.911
SIRPA	up	TYROBP	up	0	0	0	0	0.227	0	0.8	0.475	0.911
CHRDL1	down	TIMP1	up	0	0	0	0	0.063	0	0.9	0.13	0.911
LGALS1	up	FSTL3	up	0	0	0	0	0.147	0	0.9	0	0.911
SCG2	up	KNG1	down	0	0	0	0	0	0	0.9	0.156	0.911
HLA-DRA	up	TRIM22	up	0	0	0	0	0.087	0	0.9	0.111	0.911
RAB37	up	RAB42	up	0	0	0	0.765	0.061	0.082	0.9	0.265	0.911
SERPINA1	up	GPC3	down	0	0	0	0	0	0	0.9	0.152	0.911
SUCNR1	down	LPAR5	up	0	0	0	0.644	0.066	0	0.9	0.287	0.911
FPR3	up	C3	up	0	0	0	0	0.09	0	0.9	0.11	0.911
EPHX2	down	SLC27A2	down	0	0	0	0	0.081	0.084	0.9	0.075	0.911
ASB9	down	TRIM63	down	0	0	0	0	0.057	0.079	0.9	0.097	0.911
CP	up	LGALS1	up	0	0	0	0	0.061	0	0.9	0.132	0.911
CLDN8	down	CLDN10	down	0	0	0	0.839	0.062	0	0.9	0.63	0.911
COL4A6	down	ENPP1	down	0	0	0	0	0	0	0.9	0.147	0.911
GCAT	down	DAO	down	0.052	0	0	0	0.056	0	0.9	0.128	0.911
ABAT	down	AOX1	down	0	0	0	0	0.063	0	0.9	0.133	0.911
HLA-DQB2	up	HLA-E	up	0	0	0	0.666	0.061	0	0.9	0.33	0.911
COL4A3	down	COL4A1	up	0	0	0.421	0.912	0.061	0	0.9	0.709	0.911
HLA-DQB2	up	HLA-DQB1	up	0	0	0	0.974	0.138	0	0.9	0.676	0.911
SCG2	up	ALB	down	0	0	0	0	0.062	0	0.9	0.135	0.911
CXCL9	up	KNG1	down	0	0	0	0	0.052	0	0.9	0.138	0.911
PTGS1	up	CYP4F3	down	0	0	0	0	0.05	0	0.9	0.144	0.911
IL4I1	up	DDC	down	0	0	0	0	0.063	0	0.9	0.127	0.911
HLA-DQB1	up	GBP1	up	0	0	0	0	0.064	0	0.9	0.13	0.911
CD36	up	GZMA	up	0	0	0	0	0.142	0	0.9	0	0.91
LPCAT1	up	PLA2G7	up	0	0	0	0	0.061	0	0.8	0.56	0.91
NLGN1	up	EPB41L5	down	0	0	0	0	0.049	0	0.9	0.13	0.91
IL4I1	up	MAOA	down	0	0	0	0.589	0	0	0.9	0.287	0.91
LAMC1	up	C3	up	0	0	0	0	0	0	0.9	0.138	0.91
GCGR	down	KNG1	down	0	0	0	0	0.126	0	0.9	0.052	0.91
COL4A3	down	LUM	down	0	0	0	0	0	0.082	0.9	0.1	0.91
SLC5A12	down	SLC22A12	down	0	0	0	0	0.064	0.051	0	0.907	0.91
CHSY3	up	DCN	down	0	0	0	0	0.065	0	0.9	0.117	0.91
HLA-DPA1	up	FCGR1B	up	0	0	0	0	0.121	0	0.9	0.06	0.91
HLA-DQB2	up	LAG3	up	0	0	0	0	0.061	0	0.9	0.127	0.91
FGF9	down	FLRT3	down	0	0	0	0	0	0.05	0.9	0.135	0.91
CHGB	down	KNG1	down	0	0	0	0	0	0	0.9	0.14	0.91
HLA-B	up	ISG20	up	0	0	0	0	0.076	0	0.9	0.108	0.91
CXCL9	up	C5	down	0	0	0	0	0.054	0	0.9	0.125	0.91
GBP2	up	HLA-DQA1	up	0	0	0	0	0.063	0	0.9	0.119	0.91
LAPTM5	up	CD53	up	0	0	0	0	0.816	0	0	0.532	0.91
IL4I1	up	HPD	down	0.053	0	0	0	0	0	0.9	0.126	0.91
CXCL12	down	C5	down	0	0	0	0	0	0	0.9	0.146	0.91
CDH6	up	CDH3	down	0	0	0	0.781	0	0	0.9	0.479	0.91
GATA3	down	HIST1H2BK	up	0	0	0	0	0	0.131	0.9	0	0.909
TOP2A	up	LMNB1	up	0	0	0	0	0.885	0.069	0	0.221	0.909
CD36	up	SLC2A3	up	0	0	0	0	0	0	0.9	0.128	0.909
KCNJ10	down	KCNJ2	up	0	0	0.443	0.894	0	0	0.9	0.491	0.909
CD36	up	ITGAL	up	0	0	0	0	0.106	0	0.9	0.064	0.909
PSMB9	up	EGLN3	up	0	0	0	0	0	0	0.9	0.13	0.909
CDH4	up	CDH13	up	0	0	0	0.865	0.061	0	0.9	0.574	0.909
CCL28	up	LPAR5	up	0	0	0	0	0	0	0.9	0.129	0.909
IL4I1	up	ASS1	down	0	0	0	0	0	0	0.9	0.128	0.909
CXCR4	up	FPR3	up	0	0	0	0.761	0.07	0	0.9	0.292	0.909
KLHL13	down	KLHL3	down	0	0	0	0.787	0.064	0	0.9	0.347	0.909
CD36	up	ITGB2	up	0	0	0	0	0.122	0	0.9	0.048	0.909
CYP4A11	down	CYP4F3	down	0	0	0.447	0.914	0	0	0.9	0.758	0.909
LY96	up	BIRC3	up	0	0	0	0	0.088	0	0.9	0.083	0.909
FABP1	down	TRIB3	up	0	0	0	0	0	0	0.9	0.132	0.909
BTK	up	HLA-E	up	0	0	0	0	0.124	0.05	0.9	0	0.909
HLA-DQB1	up	GBP5	up	0	0	0	0	0.118	0	0.9	0.058	0.909
HLA-G	up	GBP2	up	0	0	0	0	0.06	0	0.9	0.112	0.909
GBP2	up	HLA-F	up	0	0	0	0	0.128	0	0.9	0	0.909
SIRPA	up	CYBB	up	0	0	0	0	0.119	0	0.9	0.051	0.909
CTSS	up	GGH	down	0	0	0	0	0.112	0	0.9	0.062	0.909
VAV1	up	CYFIP2	down	0	0	0	0	0.078	0	0.9	0.093	0.909
PLOD2	up	COL5A3	up	0	0	0	0	0.061	0.093	0.9	0.067	0.909
PLAU	down	SLC2A3	up	0	0	0	0	0.062	0	0.9	0.111	0.909
COL4A6	down	LUM	down	0	0	0	0	0.086	0.082	0.9	0.046	0.909
GBP5	up	HLA-F	up	0	0	0	0	0.111	0	0.9	0.068	0.909
HLA-DQB2	up	GBP2	up	0	0	0	0	0.064	0	0.9	0.11	0.909
PIGR	down	ACPP	down	0	0	0	0	0.062	0	0.9	0.113	0.909
GPC3	down	LAMC1	up	0	0	0	0	0.076	0	0.9	0.104	0.909
CD3D	up	PAG1	up	0	0	0	0	0	0	0.9	0.129	0.909
HLA-DRA	up	LAG3	up	0	0	0	0	0.062	0	0.9	0.11	0.909
HLA-E	up	CD3D	up	0	0	0	0	0.088	0	0.9	0.083	0.909
CDH4	up	CDH5	up	0	0	0	0.777	0	0	0.9	0.439	0.909
CLDN10	down	CLDN19	down	0	0	0	0.883	0	0	0.9	0.702	0.908
CYP4A11	down	ALDH1A2	down	0	0	0	0	0.063	0.085	0.9	0.056	0.908
PTGS1	up	CYP4A11	down	0	0	0	0	0.05	0	0.9	0.117	0.908
HLA-DRA	up	PAG1	up	0	0	0	0	0.065	0	0.9	0.096	0.908
HLA-DPB1	up	GBP2	up	0	0	0	0	0.108	0	0.9	0.055	0.908
CDH13	up	CDH3	down	0	0	0	0.802	0	0	0.9	0.429	0.908
HLA-DQB1	up	LAG3	up	0	0	0	0	0.06	0	0.9	0.101	0.908
DPT	down	DCN	down	0	0	0	0	0.531	0.379	0	0.711	0.908
HLA-DQB2	up	GBP1	up	0	0	0	0	0.064	0	0.9	0.096	0.908
CD3D	up	APOB	up	0	0	0	0	0.123	0	0.9	0	0.908
IL4I1	up	IDO1	up	0	0	0	0	0.075	0	0.9	0.093	0.908
HLA-DQB1	up	GBP2	up	0	0	0	0	0.098	0	0.9	0.068	0.908
KNG1	down	KISS1R	up	0	0	0	0	0	0	0.9	0.125	0.908
HLA-DPB1	up	GBP5	up	0	0	0	0	0.118	0	0.9	0	0.908
ITGB2	up	SLC15A4	up	0	0	0	0	0.061	0	0.9	0.105	0.908
CTH	down	BCKDHB	down	0	0	0	0	0.111	0	0.9	0.057	0.908
LYZ	up	TNFAIP6	up	0	0	0	0	0.078	0	0.9	0.083	0.908
GBP2	up	FCGR1B	up	0	0	0	0	0.118	0	0.9	0	0.908
COL4A4	down	LUM	down	0	0	0	0	0.063	0.082	0.9	0.064	0.908
SUCNR1	down	CXCL10	up	0	0	0	0	0.118	0	0.9	0	0.908
CCL28	up	KNG1	down	0	0	0	0	0	0	0.9	0.119	0.908
FOLR3	down	LYZ	up	0	0	0	0	0.102	0	0.9	0.059	0.908
BDKRB2	down	NMB	up	0	0	0	0	0	0	0.9	0.125	0.908
CLDN8	down	CLDN19	down	0	0	0	0.89	0.061	0	0.9	0.636	0.908
GBP5	up	ICAM1	up	0	0	0	0	0.069	0	0.9	0.096	0.908
FOLR3	down	TNFAIP6	up	0	0	0	0	0.127	0	0.9	0	0.908
SLC27A2	down	SLC2A3	up	0	0	0	0	0.054	0	0.9	0.106	0.908
RNASET2	up	LYZ	up	0	0	0	0	0.104	0	0.9	0.057	0.908
GPC3	down	STC2	up	0	0	0	0	0.077	0	0.9	0.089	0.908
LYZ	up	GGH	down	0	0	0	0	0.051	0	0.9	0.111	0.908
EDN1	up	GPR4	up	0	0	0	0	0	0	0.9	0.118	0.908
SIRPA	up	PLAU	down	0	0	0	0	0	0	0.9	0.109	0.907
GPC3	down	CHRDL1	down	0	0	0	0	0.061	0	0.9	0.091	0.907
QPRT	down	ENPP1	down	0	0	0	0	0.061	0	0.9	0.091	0.907
IGFBP3	up	GZMH	up	0	0	0	0	0	0	0.9	0.116	0.907
HLA-DPA1	up	LAG3	up	0	0	0	0	0.084	0	0.9	0.072	0.907
VCAN	up	KNG1	down	0	0	0	0	0	0	0.9	0.114	0.907
CD36	up	TNFRSF1B	up	0	0	0	0	0.106	0	0.9	0.045	0.907
CHST15	up	CSPG4	up	0	0	0	0	0	0	0.9	0.111	0.907
AOX1	down	CYP4A11	down	0	0	0	0	0.066	0	0.9	0.084	0.907
SDSL	down	BCKDHB	down	0	0	0	0	0.065	0	0.9	0.089	0.907
FGF1	down	FLRT3	down	0	0	0	0	0.065	0.05	0.9	0.078	0.907
GBP4	up	TRIM2	down	0	0	0	0	0	0	0.9	0.116	0.907
HLA-DPB1	up	HLA-DQB2	up	0	0	0	0.957	0.088	0	0.9	0.677	0.907
IGFBP3	up	KNG1	down	0	0	0	0	0.049	0	0.9	0.107	0.907
KCNJ1	down	WNK4	down	0	0	0	0	0	0.299	0	0.873	0.907
ITGB2	up	RAB37	up	0	0	0	0	0.111	0	0.9	0	0.907
PTGER1	down	KISS1R	up	0	0	0	0	0.061	0	0.9	0.094	0.907
BCKDHB	down	SDS	up	0	0	0	0	0.062	0	0.9	0.089	0.907
HLA-DPB1	up	GBP4	up	0	0	0	0	0.108	0	0.9	0.041	0.907
GPC3	down	FSTL3	up	0	0	0	0	0.056	0	0.9	0.097	0.907
SUCNR1	down	CXCL9	up	0	0	0	0	0.112	0	0.9	0	0.907
SCNN1B	down	SCN4B	up	0	0	0	0	0.062	0	0.9	0.094	0.907
HLA-DPA1	up	PAG1	up	0	0	0	0	0.069	0	0.9	0.088	0.907
HLA-DPA1	up	GBP5	up	0	0	0	0	0.112	0	0.9	0.047	0.907
FBXO2	down	TRIM9	up	0	0	0	0	0.11	0	0.9	0	0.907
BDKRB2	down	CXCL12	down	0	0	0	0	0.098	0	0.9	0.053	0.907
RUNX3	up	CTGF	down	0	0	0	0	0	0	0.9	0.112	0.907
RNASET2	up	PYCARD	up	0	0	0	0	0.116	0	0.9	0	0.907
KNG1	down	SPARC	up	0	0	0	0	0	0	0.9	0.112	0.907
PSMB9	up	CCND1	up	0	0	0	0	0	0	0.9	0.111	0.907
IGFBP3	up	CP	up	0	0	0	0	0.076	0	0.9	0.076	0.907
ADCY7	up	KNG1	down	0	0	0	0	0	0	0.9	0.11	0.907
HLA-DPB1	up	IRF6	down	0	0	0	0	0.06	0	0.9	0.096	0.907
SLIT2	down	PFN2	down	0	0	0	0	0.111	0	0.9	0	0.907
ALB	down	FSTL3	up	0	0	0	0	0	0	0.9	0.109	0.907
FN1	up	PROC	down	0	0	0	0	0	0	0.9	0.106	0.906
CHGB	down	LAMC1	up	0	0	0	0	0	0	0.9	0.102	0.906
ADCY7	up	FPR3	up	0	0	0	0	0.086	0.06	0.9	0	0.906
ADH6	down	MAOA	down	0	0	0	0	0	0	0.9	0.106	0.906
NEDD4L	down	TRIM63	down	0	0	0	0	0.051	0.05	0.9	0.085	0.906
SIRPA	up	TREM2	up	0	0	0	0	0.159	0	0.8	0.488	0.906
VEGFA	up	CXCL12	down	0	0	0	0	0.061	0	0	0.904	0.906
LAMC1	up	APOB	up	0	0	0	0	0	0	0.9	0.099	0.906
TRIM63	down	TRIM9	up	0	0	0	0.657	0	0	0.9	0.21	0.906
VDR	down	GC	down	0	0	0	0	0.062	0.057	0	0.902	0.906
HLA-DQB2	up	GBP5	up	0	0	0	0	0.086	0	0.9	0.059	0.906
KLHL3	down	TRIM9	up	0	0	0	0	0.1	0	0.9	0	0.906
IRF6	down	ICAM1	up	0	0	0	0	0	0	0.9	0.107	0.906
LYPD6B	down	NTNG1	down	0	0	0	0	0	0	0.9	0.104	0.906
FN1	up	SCG2	up	0	0	0	0	0	0	0.9	0.104	0.906
CCL5	up	CASR	down	0	0	0	0	0	0	0.9	0.1	0.906
FCER1G	up	FCGR2A	up	0	0	0	0	0.619	0	0	0.765	0.906
HRG	down	SPARC	up	0	0	0	0	0	0	0.9	0.108	0.906
GDPD3	down	ENPP6	down	0	0	0	0	0.064	0	0.9	0.082	0.906
ADCY7	up	EDN1	up	0	0	0	0	0	0	0.9	0.104	0.906
TRIM22	up	HLA-DQB1	up	0	0	0	0	0.089	0	0.9	0.053	0.906
SLC12A1	down	KCNJ1	down	0	0	0	0	0.149	0	0	0.895	0.906
HLA-DPB1	up	TRIM22	up	0	0	0	0	0.098	0	0.9	0.046	0.906
CDH4	up	CDH3	down	0	0	0	0.899	0	0	0.9	0.65	0.906
STC2	up	LGALS1	up	0	0	0	0	0.061	0	0.9	0.081	0.906
TFAP2B	down	KIT	down	0	0	0	0	0	0	0.9	0.1	0.906
CTSS	up	ALDOC	up	0	0	0	0	0.052	0	0.9	0.09	0.906
AK3	down	ENTPD1	up	0	0	0	0	0	0	0.9	0.101	0.906
FPR3	up	KNG1	down	0	0	0	0	0	0	0.9	0.106	0.906
NEDD4L	down	ASB9	down	0	0	0	0	0.051	0.084	0.9	0.05	0.906
ENPP3	up	PYGL	up	0	0	0	0	0.062	0	0.9	0.081	0.906
RAB37	up	ITGAL	up	0	0	0	0	0.101	0	0.9	0	0.906
VAV1	up	HLA-DRA	up	0	0	0	0	0.098	0	0.9	0.047	0.906
SUCNR1	down	KNG1	down	0	0	0	0	0.063	0	0.9	0.085	0.906
APLN	up	SUCNR1	down	0	0	0	0	0	0	0.9	0.104	0.906
HLA-DPA1	up	TRIM22	up	0	0	0	0	0.088	0	0.9	0.056	0.906
CXCR4	up	ADCY7	up	0	0	0	0	0.063	0.06	0.9	0.059	0.906
LPAR5	up	GPR4	up	0	0	0	0.709	0	0	0.9	0.267	0.906
GCAT	down	AGXT	down	0	0	0	0	0.061	0	0.9	0.087	0.906
GBP5	up	HLA-DQA1	up	0	0	0	0	0.098	0	0.9	0.05	0.906
ASPM	up	KIAA0101	up	0	0	0	0	0.903	0	0	0.068	0.906
TRIM22	up	HLA-E	up	0	0	0	0	0.088	0	0.9	0.058	0.906
RDH12	down	AOX1	down	0	0	0	0	0	0	0.9	0.106	0.906
FXYD4	down	ATP1A1	down	0	0	0	0	0	0	0.9	0.103	0.906
CSPG4	up	CHSY3	up	0	0	0	0	0.103	0	0.9	0.045	0.906
HRG	down	TIMP1	up	0	0	0	0	0	0	0.9	0.091	0.905
COL23A1	up	PLOD2	up	0	0	0	0	0	0.093	0.9	0.043	0.905
FOLR3	down	DOCK2	up	0	0	0	0	0.096	0	0.9	0	0.905
GBP4	up	FCGR1B	up	0	0	0	0	0.089	0	0.9	0.043	0.905
ISG20	up	HLA-F	up	0	0	0	0	0.088	0	0.9	0.049	0.905
CHRDL1	down	FN1	up	0	0	0	0	0	0	0.9	0.094	0.905
NMB	up	GPR4	up	0	0	0	0	0	0	0.9	0.09	0.905
PLAU	down	ITGAL	up	0	0	0	0	0	0	0.9	0.089	0.905
LAMC1	up	FSTL3	up	0	0	0	0	0.098	0	0.9	0	0.905
ENPP1	down	COL4A2	up	0	0	0	0	0	0	0.9	0.096	0.905
SPTBN2	down	SCN4B	up	0	0	0	0	0.098	0	0.9	0	0.905
ITGB2	up	PLAT	down	0	0	0	0	0	0	0.9	0.093	0.905
COL23A1	up	PLOD3	up	0	0	0	0	0	0.093	0.9	0.043	0.905
VCAN	up	C3	up	0	0	0	0	0	0	0.9	0.093	0.905
HLA-B	up	FCGR1B	up	0	0	0	0	0.084	0	0.9	0.048	0.905
SCN4B	up	SCNN1G	down	0	0	0	0	0	0	0.9	0.089	0.905
SERPINA1	up	SPARC	up	0	0	0	0	0	0	0.9	0.091	0.905
HLA-DQB2	up	IRF6	down	0	0	0	0	0.06	0	0.9	0.076	0.905
GPC3	down	GPC5	down	0	0	0	0.901	0	0	0.9	0.62	0.905
TRIM22	up	HLA-F	up	0	0	0	0	0.09	0	0.9	0	0.905
HLA-DPB1	up	GBP1	up	0	0	0	0	0.097	0	0.9	0	0.905
RAB37	up	CD53	up	0	0	0	0	0.098	0	0.9	0	0.905
CASR	down	NMB	up	0	0	0	0	0	0	0.9	0.092	0.905
CASR	down	ADCY7	up	0	0	0	0	0	0	0.9	0.096	0.905
GPC3	down	PROC	down	0	0	0	0	0.078	0	0.9	0.055	0.905
EGF	down	PAG1	up	0	0	0	0	0	0	0.9	0.096	0.905
HLA-E	up	GBP5	up	0	0	0	0	0.098	0	0.9	0	0.905
ACAT1	down	ACLY	up	0.046	0	0	0	0.078	0	0.8	0.525	0.905
ASB9	down	TRIM9	up	0	0	0	0	0.062	0	0.9	0.074	0.905
HSPA2	down	HIST1H2BK	up	0	0	0	0	0.061	0.05	0.9	0.069	0.905
SERPINA1	up	CHGB	down	0	0	0	0	0	0	0.9	0.095	0.905
PROC	down	TIMP1	up	0	0	0	0	0	0	0.9	0.089	0.905
RAB37	up	CYBB	up	0	0	0	0	0.095	0	0.9	0	0.905
STC2	up	TIMP1	up	0	0	0	0	0.063	0	0.9	0.074	0.905
CASR	down	SUCNR1	down	0	0	0	0	0	0	0.9	0.09	0.905
SLC27A2	down	SLC15A4	up	0	0	0	0	0	0	0.9	0.098	0.905
FABP5	up	C3	up	0	0	0	0	0.049	0	0.9	0.09	0.905
CASR	down	PTGER1	down	0	0	0	0	0	0.057	0.9	0.078	0.905
CASR	down	KISS1R	up	0	0	0	0	0.061	0.057	0.9	0.057	0.905
GBP4	up	HLA-F	up	0	0	0	0	0.091	0	0.9	0.042	0.905
ALB	down	STC2	up	0	0	0	0	0.065	0	0.9	0.067	0.905
COL4A3	down	PLOD3	up	0	0	0	0	0	0.093	0.9	0.043	0.905
ADORA3	up	C5	down	0	0	0	0	0	0	0.9	0.093	0.905
ENPP1	down	GMPR	down	0	0	0	0	0	0	0.9	0.095	0.905
CD52	up	XPNPEP2	down	0	0	0	0	0.098	0	0.9	0	0.905
PLOD2	up	PLOD3	up	0	0	0	0.965	0.061	0	0.9	0.913	0.905
ITGA4	up	CSPG4	up	0	0	0	0	0.082	0	0.9	0.05	0.905
CCND2	up	CCND1	up	0	0	0	0.961	0.061	0	0.9	0.827	0.905
HLA-E	up	FCGR1B	up	0	0	0	0	0.096	0	0.9	0	0.905
HLA-E	up	ISG20	up	0	0	0	0	0.087	0	0.9	0	0.904
KLHL13	down	TRIM63	down	0	0	0	0	0.061	0	0.9	0.067	0.904
QRFPR	up	GPR4	up	0	0	0	0.623	0	0	0.9	0.146	0.904
SPARC	up	DCN	down	0	0	0	0	0.715	0	0	0.677	0.904
CASR	down	QRFPR	up	0	0	0	0	0	0	0.9	0.08	0.904
FCGR1B	up	HLA-F	up	0	0	0	0	0.084	0	0.9	0	0.904
CXCL12	down	LPAR5	up	0	0	0	0	0	0	0.9	0.081	0.904
VIM	up	MYL3	down	0	0	0	0	0.054	0	0.9	0.072	0.904
GPR4	up	KNG1	down	0	0	0	0	0	0	0.9	0.083	0.904
FCGR1B	up	HLA-DQA1	up	0	0	0	0	0.087	0	0.9	0.041	0.904
CCL5	up	LPAR5	up	0	0	0	0	0	0	0.9	0.086	0.904
PLAU	down	CD300A	up	0	0	0	0	0.061	0	0.9	0.062	0.904
CD36	up	CD53	up	0	0	0	0	0.088	0	0.9	0	0.904
KLHL13	down	ASB9	down	0	0	0	0	0.088	0	0.9	0	0.904
CXCR4	up	LPAR5	up	0	0	0	0.663	0.065	0	0.9	0.09	0.904
VIM	up	TNNC1	down	0	0	0	0	0.062	0	0.9	0.067	0.904
HLA-B	up	TRIM22	up	0	0	0	0	0.076	0	0.9	0.049	0.904
CCL20	up	KNG1	down	0	0	0	0	0	0	0.9	0.081	0.904
TNFSF13B	up	PSMB10	up	0	0	0	0	0.049	0	0.9	0.079	0.904
ITGB2	up	PROC	down	0	0	0	0	0.081	0	0.9	0	0.904
CASR	down	C5	down	0	0	0	0	0	0	0.9	0.08	0.904
CCL20	up	FPR3	up	0	0	0	0	0.065	0	0.9	0.058	0.904
FBXL16	up	KLHL3	down	0	0	0	0	0.084	0	0.9	0	0.904
VAV1	up	ITGAL	up	0	0	0	0	0.293	0	0.8	0.378	0.904
CYBB	up	SLC2A3	up	0	0	0	0	0	0	0.9	0.08	0.904
CYBB	up	SLC15A4	up	0	0	0	0	0.062	0	0.9	0.067	0.904
HLA-DPB1	up	FCGR1B	up	0	0	0	0	0.088	0	0.9	0	0.904
ENTPD1	up	TYMS	up	0	0	0	0	0.063	0	0.9	0.067	0.904
QRFPR	up	LPAR5	up	0	0	0	0.594	0	0	0.9	0.143	0.904
ADCY7	up	LPAR5	up	0	0	0	0	0.08	0	0.9	0	0.904
HLA-G	up	GBP1	up	0	0	0	0	0	0	0.9	0.08	0.904
HLA-DPA1	up	TRIM2	down	0	0	0	0	0	0	0.9	0.086	0.904
TRIM22	up	FCGR1B	up	0	0	0	0	0.069	0	0.9	0.056	0.904
IGFBP3	up	CHRDL1	down	0	0	0	0	0.062	0	0.9	0.067	0.904
HLA-B	up	GBP5	up	0	0	0	0	0.088	0	0.9	0	0.904
C3	up	LGALS1	up	0	0	0	0	0.049	0	0.9	0.08	0.904
FPR3	up	LPAR5	up	0	0	0	0.61	0.073	0	0.9	0.073	0.904
KLHL13	down	TRIM9	up	0	0	0	0	0.077	0	0.9	0	0.903
CD300A	up	SLC2A3	up	0	0	0	0	0.07	0	0.9	0	0.903
TNFRSF1B	up	PSMB10	up	0	0	0	0	0.073	0	0.9	0.043	0.903
ALDH1B1	down	ACOT12	down	0	0	0	0	0.063	0	0.9	0.056	0.903
SIRPA	up	SLC2A3	up	0	0	0	0	0	0	0.9	0.071	0.903
ENPP3	up	QPRT	down	0	0	0	0	0.061	0	0.9	0.056	0.903
TRIM22	up	ICAM1	up	0	0	0	0	0.067	0	0.9	0.046	0.903
GGH	down	ALDOC	up	0	0	0	0	0	0	0.9	0.072	0.903
ITGB2	up	TYROBP	up	0	0	0	0	0.852	0	0	0.377	0.903
GBP1	up	CXCL10	up	0	0	0	0	0.796	0	0	0.544	0.903
PLA2G7	up	APOB	up	0	0	0	0	0	0	0.72	0.669	0.903
CHRDL1	down	STC2	up	0	0	0	0	0.064	0	0.9	0.056	0.903
HLA-DQB1	up	IRF6	down	0	0	0	0	0.06	0	0.9	0.054	0.903
SERPINA1	up	FOLR1	down	0	0	0	0	0.066	0.051	0.9	0	0.903
EDN1	up	LPAR5	up	0	0	0	0	0.05	0	0.9	0.064	0.903
CCL5	up	BDKRB2	down	0	0	0	0	0	0	0.9	0.073	0.903
CCL5	up	ADCY7	up	0	0	0	0	0.069	0	0.9	0.05	0.903
APOM	down	APOB	up	0	0	0	0	0.135	0	0.72	0.634	0.903
NMB	up	KISS1R	up	0	0	0	0	0	0	0.9	0.073	0.903
HLA-DQB1	up	TRIM2	down	0	0	0	0	0	0	0.9	0.075	0.903
HLA-DQB2	up	TRIM2	down	0	0	0	0	0	0	0.9	0.075	0.903
VCAN	up	FSTL3	up	0	0	0	0	0	0	0.9	0.073	0.903
GBP4	up	ICAM1	up	0	0	0	0	0.061	0	0.9	0.058	0.903
ENPP1	down	PYGL	up	0	0	0	0	0.061	0	0.9	0.055	0.903
NMB	up	QRFPR	up	0	0	0	0	0	0	0.9	0.07	0.903
ASB9	down	KLHL3	down	0	0	0	0	0	0	0.9	0.073	0.903
ACLY	up	C3	up	0	0	0	0	0	0	0.9	0.071	0.903
SCG2	up	LAMC1	up	0	0	0	0	0	0	0.9	0.073	0.903
FABP5	up	LYZ	up	0	0	0	0	0.061	0	0.9	0.051	0.903
KNG1	down	LGALS1	up	0	0	0	0	0.063	0	0.9	0.056	0.903
CD36	up	PLAU	down	0	0	0	0	0.062	0	0.9	0.05	0.903
GPC3	down	CP	up	0	0	0	0	0.064	0	0.9	0.053	0.903
SERPINA1	up	STC2	up	0	0	0	0	0.051	0	0.9	0.062	0.903
CDH5	up	CDH6	up	0	0	0	0.88	0	0	0.9	0.35	0.903
ADORA3	up	C3	up	0	0	0	0	0	0	0.9	0.079	0.903
PDE10A	#N/A	AK3	down	0	0	0	0	0.062	0	0.9	0.058	0.903
HLA-E	up	GBP4	up	0	0	0	0	0.074	0	0.9	0.042	0.903
GGH	down	PYCARD	up	0	0	0	0	0.076	0	0.9	0	0.903
SERPINA1	up	LAMC1	up	0	0	0	0	0	0	0.9	0.073	0.903
CD36	up	SLC15A4	up	0	0	0	0	0.063	0	0.9	0.049	0.903
PECAM1	up	VWF	up	0	0	0	0	0.175	0	0	0.887	0.903
CXCR4	up	SUCNR1	down	0	0	0	0.663	0.065	0	0.9	0.073	0.903
CASR	down	CXCL10	up	0	0	0	0	0	0	0.9	0.077	0.903
STC2	up	C3	up	0	0	0	0	0	0	0.9	0.07	0.903
CASR	down	FPR3	up	0	0	0	0	0	0.057	0.9	0.058	0.903
ADORA3	up	CCL20	up	0	0	0	0	0	0	0.9	0.061	0.902
FCGR1B	up	ICAM1	up	0	0	0	0	0.055	0	0.9	0.052	0.902
LAMC1	up	PROC	down	0	0	0	0	0	0	0.9	0.064	0.902
RUNX3	up	PSMB10	up	0	0	0	0	0.069	0	0.9	0	0.902
SPTBN2	down	HLA-DQB2	up	0	0	0	0	0	0	0.9	0.063	0.902
SCG2	up	VCAN	up	0	0	0	0	0.054	0	0.9	0.056	0.902
GCGR	down	KISS1R	up	0	0	0	0	0	0	0.9	0.062	0.902
FABP5	up	GGH	down	0	0	0	0	0.065	0	0.9	0.041	0.902
HLA-DQB2	up	TRIM22	up	0	0	0	0	0.069	0	0.9	0	0.902
BDKRB2	down	CXCR4	up	0	0	0	0.732	0	0	0.9	0.138	0.902
PGAM2	down	ALDOC	up	0.073	0	0	0	0.171	0.436	0.6	0.522	0.902
VEGFA	up	PECAM1	up	0	0	0	0	0	0	0	0.902	0.902
CXCL12	down	ADCY7	up	0	0	0	0	0	0	0.9	0.064	0.902
CXCL12	down	SUCNR1	down	0	0	0	0	0.061	0	0.9	0.049	0.902
TPD52L1	down	SH3GL2	down	0	0	0	0	0.061	0	0.9	0	0.902
HLA-G	up	GBP5	up	0	0	0	0	0.063	0	0.9	0	0.902
C3	up	FSTL3	up	0	0	0	0	0.069	0	0.9	0	0.902
SCG2	up	STC2	up	0	0	0	0	0	0	0.9	0.065	0.902
ACAA1	down	GGH	down	0	0	0	0	0.062	0	0.9	0	0.902
IL4I1	up	BHMT	down	0	0	0	0	0	0	0.9	0.065	0.902
ITGB2	up	APOB	up	0	0	0	0	0	0	0.9	0.069	0.902
IFI27	up	HLA-E	up	0	0	0	0	0.069	0	0.9	0	0.902
CD163	up	CSF1R	up	0	0	0	0	0.779	0	0	0.575	0.902
GCGR	down	EDN1	up	0	0	0	0	0	0	0.9	0.068	0.902
BDKRB2	down	CCL20	up	0	0	0	0	0.061	0	0.9	0	0.902
HLA-E	up	TREM2	up	0	0	0	0	0.065	0	0.9	0	0.902
GGH	down	GSTM3	down	0	0	0	0	0.061	0	0.9	0.049	0.902
SPTBN2	down	FOLR1	down	0	0	0	0	0.066	0	0.9	0	0.902
SUCNR1	down	C3	up	0	0	0	0	0.064	0	0.9	0	0.902
IGFBP3	up	PROC	down	0	0	0	0	0.062	0	0.9	0	0.902
GGH	down	ACLY	up	0	0	0	0	0.069	0	0.9	0	0.902
COL4A1	up	F12	up	0	0	0	0	0	0.063	0.9	0.043	0.902
CHRDL1	down	ALB	down	0	0	0	0	0	0	0.9	0.066	0.902
TPD52L1	down	AP1M2	down	0	0	0	0	0.061	0	0.9	0	0.902
SH3GL2	down	AP1M2	down	0	0	0	0	0	0	0.9	0.063	0.902
SIRPA	up	CD53	up	0	0	0	0	0.065	0	0.9	0	0.902
GBP1	up	TRIM2	down	0	0	0	0	0	0	0.9	0.066	0.902
GP2	down	XPNPEP2	down	0	0	0	0	0.061	0	0.9	0	0.902
CCL5	up	SUCNR1	down	0	0	0	0	0.067	0	0.9	0	0.902
ITGB2	up	SLC27A2	down	0	0	0	0	0.051	0	0.9	0.058	0.902
RAB42	up	RAB25	down	0	0	0	0.759	0	0	0.9	0.137	0.902
HLA-DPB1	up	PAG1	up	0	0	0	0	0.062	0	0.9	0	0.902
PSMB10	up	BIRC3	up	0	0	0	0	0.062	0	0.9	0	0.902
COL4A6	down	F12	up	0	0	0	0	0	0.063	0.9	0.043	0.902
FBXL16	up	TRIM63	down	0	0	0	0	0.064	0	0.9	0	0.902
CCL5	up	APLN	up	0	0	0	0	0	0	0.9	0.067	0.902
ENPP3	up	PANK1	down	0	0	0	0	0.062	0	0.9	0	0.902
GPC3	down	C3	up	0	0	0	0	0	0	0.9	0.069	0.902
GIT2	up	LAMA4	up	0	0	0	0	0.064	0	0.9	0	0.902
APOB	up	LGALS1	up	0	0	0	0	0	0	0.9	0.061	0.902
APOB	up	SPARC	up	0	0	0	0	0	0	0.9	0.066	0.902
FBXL16	up	ASB9	down	0	0	0	0	0.064	0	0.9	0	0.902
SERPINA1	up	LGALS1	up	0	0	0	0	0	0	0.9	0.067	0.902
GIT2	up	LAMC1	up	0	0	0	0	0.064	0	0.9	0	0.902
ENTPD1	up	GMPR	down	0	0	0	0	0.061	0	0.9	0.049	0.902
COL4A3	down	F12	up	0	0	0	0	0	0.063	0.9	0.043	0.902
SUCNR1	down	C5	down	0	0	0	0	0.063	0	0.9	0	0.902
ADCY7	up	C5	down	0	0	0	0	0.062	0	0.9	0.044	0.902
BDKRB2	down	CXCL10	up	0	0	0	0	0.062	0	0.9	0.048	0.902
TFAP2B	down	CAV1	up	0	0	0	0	0.062	0	0.9	0	0.902
IFI27	up	IRF6	down	0	0	0	0	0	0	0.9	0.064	0.902
CHGB	down	VCAN	up	0	0	0	0	0	0	0.9	0.063	0.902
ENPP1	down	PANK1	down	0	0	0	0	0.062	0	0.9	0	0.902
LPAR5	up	KNG1	down	0	0	0	0	0	0	0.9	0.065	0.902
CXCL9	up	LPAR5	up	0	0	0	0	0.064	0	0.9	0	0.902
TNFAIP6	up	ALDOC	up	0	0	0	0	0	0	0.9	0.066	0.902
SPTBN2	down	HLA-DQB1	up	0	0	0	0	0	0	0.9	0.063	0.902
CD3D	up	EGF	down	0	0	0	0	0	0	0.9	0.066	0.902
GCGR	down	NMB	up	0	0	0	0	0	0	0.9	0.062	0.902
HADH	down	AOX1	down	0	0	0	0	0	0	0.9	0.063	0.902
HSPA2	down	HSPA6	up	0	0	0.449	0.98	0.047	0	0.9	0.443	0.902
COL4A2	up	F12	up	0	0	0	0	0	0.063	0.9	0.043	0.902
COL4A4	down	F12	up	0	0	0	0	0	0.063	0.9	0.043	0.902
NEDD4L	down	FBXL16	up	0	0	0	0	0.062	0	0.9	0.044	0.902
ITGAL	up	SLC15A4	up	0	0	0	0	0.062	0	0.9	0.042	0.902
CHGB	down	C3	up	0	0	0	0	0	0	0.9	0.066	0.902
CD53	up	SLC2A3	up	0	0	0	0	0.063	0	0.9	0	0.902
CCL20	up	C5	down	0	0	0	0	0	0	0.9	0.063	0.902
GPC3	down	KNG1	down	0	0	0	0	0	0	0.9	0.065	0.902
NEDD4L	down	TRIM9	up	0	0	0	0	0.061	0	0.9	0.048	0.902
ITGB2	up	SLC2A3	up	0	0	0	0	0.063	0	0.9	0	0.902
RAB37	up	TNFRSF1B	up	0	0	0	0	0.063	0	0.9	0	0.902
ADCY7	up	C3	up	0	0	0	0	0.062	0	0.9	0.044	0.902
KNG1	down	FSTL3	up	0	0	0	0	0	0	0.9	0.062	0.902
RNASET2	up	C3	up	0	0	0	0	0.056	0	0.9	0	0.901
KLHL13	down	NEDD4L	down	0	0	0	0	0.052	0	0.9	0	0.901
ENPP3	up	AK3	down	0	0	0	0	0.049	0	0.9	0.05	0.901
ADCY7	up	SUCNR1	down	0	0	0	0	0.06	0	0.9	0	0.901
PLAU	down	SLC15A4	up	0	0	0	0	0	0	0.9	0.058	0.901
ST3GAL6	down	LUM	down	0	0	0	0	0	0	0.9	0.059	0.901
AK3	down	ENPP1	down	0	0	0	0	0.049	0	0.9	0.05	0.901
HLA-DRA	up	TRIM2	down	0	0	0	0	0	0	0.9	0.055	0.901
HIST1H2BK	up	CCND1	up	0	0	0	0	0	0	0.9	0.053	0.901
BDKRB2	down	CASR	down	0	0	0	0	0	0	0.9	0.051	0.901
ENPP3	up	GMPR	down	0	0	0	0	0	0	0.9	0.052	0.901
HLA-DPB1	up	LAG3	up	0	0	0	0	0	0	0.9	0.054	0.901
SERPINA1	up	CHRDL1	down	0	0	0	0	0.055	0	0.9	0	0.901
GCGR	down	PTGER1	down	0	0	0	0	0	0	0.9	0.057	0.901
GPR4	up	KISS1R	up	0	0	0	0.601	0	0	0.9	0.087	0.901
IRF6	down	HLA-DQA1	up	0	0	0	0	0.049	0	0.9	0.049	0.901
FOLR1	down	TGFA	up	0	0	0	0	0	0	0.9	0.053	0.901
VCAN	up	CP	up	0	0	0	0	0	0	0.9	0.053	0.901
CHRDL1	down	CP	up	0	0	0	0	0.057	0	0.9	0	0.901
LPAR5	up	C3	up	0	0	0	0	0	0	0.9	0.055	0.901
CCL28	up	C3	up	0	0	0	0	0	0	0.9	0.057	0.901
TNFRSF1B	up	SLC15A4	up	0	0	0	0	0.055	0	0.9	0	0.901
HLA-B	up	TRIM2	down	0	0	0	0	0	0	0.9	0.057	0.901
PDE1A	down	AK3	down	0	0	0	0	0.051	0	0.9	0.049	0.901
FOLR1	down	ANK2	down	0	0	0	0	0	0.059	0.9	0	0.901
SCG2	up	FSTL3	up	0	0	0	0	0.043	0	0.9	0.054	0.901
ABAT	down	SORD	down	0.16	0	0	0	0.062	0.867	0	0.175	0.901
COL4A4	down	ENPP1	down	0	0	0	0	0	0	0.9	0.057	0.901
RAB37	up	SLC2A3	up	0	0	0	0	0.056	0	0.9	0	0.901
PLAU	down	CD53	up	0	0	0	0	0	0	0.9	0.053	0.901
PROC	down	FSTL3	up	0	0	0	0	0	0	0.9	0.053	0.901
COL4A1	up	ENPP1	down	0	0	0	0	0	0	0.9	0.057	0.901
APLN	up	CXCL10	up	0	0	0	0	0	0	0.9	0.047	0.9
EYA4	down	HIST1H2BK	up	0	0	0	0	0	0	0.9	0	0.9
C1QA	up	CSF1R	up	0	0	0	0	0.876	0	0	0.226	0.9
SPTBN2	down	HLA-DPA1	up	0	0	0	0	0	0	0.9	0	0.9
SPTBN2	down	HLA-DRA	up	0	0	0	0	0	0	0.9	0	0.9
COL4A3	down	ENPP1	down	0	0	0	0	0	0	0.9	0	0.9
HLA-DPA1	up	AP1M2	down	0	0	0	0	0	0	0.9	0	0.9
HLA-G	up	ISG20	up	0	0	0	0	0	0	0.9	0	0.9
RAB37	up	LPCAT1	up	0	0	0	0	0	0	0.9	0	0.9
APLN	up	CXCL9	up	0	0	0	0	0	0	0.9	0	0.9
HOXA4	up	HIST1H2BK	up	0	0	0	0	0	0	0.9	0	0.9
IRF6	down	HLA-F	up	0	0	0	0	0	0	0.9	0.043	0.9
SERPINA1	up	SCG2	up	0	0	0	0	0	0	0.9	0	0.9
AP1M2	down	CD74	up	0	0	0	0	0	0	0.9	0	0.9
RAB37	up	PLAU	down	0	0	0	0	0	0	0.9	0	0.9
CHRDL1	down	PROC	down	0	0	0	0	0	0	0.9	0	0.9
SH3GL2	down	RPS6KA6	down	0	0	0	0	0	0	0.9	0	0.9
IRF6	down	TRIM2	down	0	0	0	0	0	0	0.9	0	0.9
IGFBP3	up	CHGB	down	0	0	0	0	0	0	0.9	0	0.9
ITGAL	up	SLC27A2	down	0	0	0	0	0	0	0.9	0	0.9
HLA-DQB2	up	SH3GL2	down	0	0	0	0	0	0	0.9	0	0.9
CASR	down	APLN	up	0	0	0	0	0	0	0.9	0.043	0.9
PSMB10	up	EGLN3	up	0	0	0	0	0	0	0.9	0	0.9
RAB37	up	SLC15A4	up	0	0	0	0	0	0	0.9	0	0.9
LYPD6B	down	CD52	up	0	0	0	0	0	0	0.9	0	0.9
CHGB	down	CHRDL1	down	0	0	0	0	0	0	0.9	0	0.9
HLA-DPB1	up	TRIM2	down	0	0	0	0	0	0	0.9	0	0.9
HLA-DRA	up	AP1M2	down	0	0	0	0	0	0	0.9	0	0.9
APLN	up	LPAR5	up	0	0	0	0	0	0	0.9	0	0.9
HLA-DQA1	up	PAG1	up	0	0	0	0	0	0	0.9	0	0.9
GBP4	up	IRF6	down	0	0	0	0	0	0	0.9	0.048	0.9
SH3GL2	down	HLA-DQB1	up	0	0	0	0	0	0	0.9	0	0.9
VCAN	up	PROC	down	0	0	0	0	0	0	0.9	0	0.9
HLA-DQA1	up	AP1M2	down	0	0	0	0	0	0	0.9	0	0.9
QRFPR	up	EDN1	up	0	0	0	0	0	0	0.9	0.046	0.9
APLN	up	ADORA3	up	0	0	0	0	0	0	0.9	0	0.9
CHRDL1	down	LGALS1	up	0	0	0	0	0	0	0.9	0	0.9
CD8A	up	PAG1	up	0	0	0	0	0	0	0.9	0	0.9
BDKRB2	down	KISS1R	up	0	0	0	0.645	0	0	0.9	0	0.9
HIST1H2BK	up	DNMT3L	down	0	0	0	0	0	0	0.9	0	0.9
APLN	up	ADCY7	up	0	0	0	0	0	0	0.9	0	0.9
HLA-B	up	GBP4	up	0	0	0	0	0	0	0.9	0.042	0.9
CHGB	down	APOB	up	0	0	0	0	0	0	0.9	0.045	0.9
SUCNR1	down	CCL20	up	0	0	0	0	0	0	0.9	0	0.9
ADCY7	up	CCL20	up	0	0	0	0	0	0	0.9	0	0.9
HLA-G	up	TRIM2	down	0	0	0	0	0	0	0.9	0	0.9
CHRDL1	down	KNG1	down	0	0	0	0	0	0	0.9	0	0.9
ADCY7	up	CCL28	up	0	0	0	0	0	0	0.9	0.041	0.9
ADM	up	ADCY7	up	0	0	0	0	0	0	0.9	0	0.9
LYZ	up	ALDOC	up	0	0	0	0	0	0	0.9	0	0.9
CASR	down	CCL20	up	0	0	0	0	0	0	0.9	0	0.9
RAB37	up	ACPP	down	0	0	0	0	0	0	0.9	0	0.9
HLA-G	up	GBP4	up	0	0	0	0	0	0	0.9	0.042	0.9
BDKRB2	down	LPAR5	up	0	0	0	0.667	0	0	0.9	0	0.9
GSTO2	down	GGH	down	0	0	0	0	0	0	0.9	0	0.9
SERPINA1	up	FSTL3	up	0	0	0	0	0	0	0.9	0.042	0.9
ABCA1	up	SCARB1	up	0	0	0	0	0.061	0	0	0.898	0.9
CD53	up	SLC15A4	up	0	0	0	0	0	0	0.9	0	0.9
CP	up	FSTL3	up	0	0	0	0	0	0	0.9	0	0.9
FCGR1B	up	IRF6	down	0	0	0	0	0.049	0	0.9	0	0.9
SCG2	up	LGALS1	up	0	0	0	0	0	0	0.9	0	0.9
SPTBN2	down	HLA-DMA	up	0	0	0	0	0	0	0.9	0	0.9
ADCY7	up	CXCL9	up	0	0	0	0	0	0	0.9	0	0.9
CHGB	down	FSTL3	up	0	0	0	0	0	0	0.9	0.049	0.9
HLA-DPA1	up	IRF6	down	0	0	0	0	0.049	0	0.9	0	0.9
HLA-G	up	TRIM22	up	0	0	0	0	0	0	0.9	0	0.9
HIST1H2BK	up	SPI1	up	0	0	0	0	0	0	0.9	0	0.9
RAB37	up	SLC27A2	down	0	0	0	0	0	0	0.9	0	0.9
RNASET2	up	ACLY	up	0	0	0	0	0	0	0.9	0	0.9
ACLY	up	PYCARD	up	0	0	0	0	0	0	0.9	0	0.9
CHRDL1	down	LAMC1	up	0	0	0	0	0	0	0.9	0	0.9
LPAR5	up	C5	down	0	0	0	0	0	0	0.9	0	0.9
TRIM63	down	FBXO2	down	0	0	0	0	0	0	0.9	0	0.9
SUCNR1	down	CCL28	up	0	0	0	0	0	0	0.9	0	0.9
HLA-DPA1	up	SH3GL2	down	0	0	0	0	0	0	0.9	0	0.9
NMB	up	LPAR5	up	0	0	0	0	0	0	0.9	0	0.9
HLA-G	up	FCGR1B	up	0	0	0	0	0.05	0	0.9	0	0.9
HLA-E	up	IRF6	down	0	0	0	0	0	0	0.9	0.043	0.9
KNG1	down	LAMC1	up	0	0	0	0	0	0	0.9	0	0.9
GPC3	down	SCG2	up	0	0	0	0	0	0	0.9	0	0.9
PIGR	down	LPCAT1	up	0	0	0	0	0	0	0.9	0	0.9
ESRP1	down	APBB1IP	up	0	0	0	0	0	0	0.9	0	0.9
TRIM2	down	HLA-F	up	0	0	0	0	0	0	0.9	0	0.9
SCG2	up	TIMP1	up	0	0	0	0	0	0	0.9	0.041	0.9
TRIM2	down	HLA-DQA1	up	0	0	0	0	0	0	0.9	0	0.9
GBP2	up	TRIM2	down	0	0	0	0	0	0	0.9	0	0.9
GCGR	down	GPR4	up	0	0	0	0	0	0	0.9	0.043	0.9
APLN	up	CCL20	up	0	0	0	0	0	0	0.9	0.046	0.9
APOB	up	FSTL3	up	0	0	0	0	0	0	0.9	0	0.9
APLN	up	C5	down	0	0	0	0	0	0	0.9	0	0.9
GP2	down	NTNG1	down	0	0	0	0	0	0	0.9	0	0.9
IGFBP3	up	SCG2	up	0	0	0	0	0	0	0.9	0	0.9
FOLR3	down	ACAA1	down	0	0	0	0	0	0	0.9	0	0.9
HLA-DRA	up	SH3GL2	down	0	0	0	0	0	0	0.9	0	0.9
TNFRSF1B	up	SLC27A2	down	0	0	0	0	0	0	0.9	0	0.9
CCL28	up	C5	down	0	0	0	0	0	0	0.9	0.05	0.9
SH3GL2	down	CD74	up	0	0	0	0	0	0	0.9	0	0.9
CHRDL1	down	C3	up	0	0	0	0	0	0	0.9	0	0.9
TRIM63	down	KLHL3	down	0	0	0	0	0	0	0.9	0	0.9
SCG2	up	PROC	down	0	0	0	0	0	0	0.9	0	0.9
ADCY7	up	CXCL10	up	0	0	0	0	0	0	0.9	0	0.9
CD52	up	NTNG1	down	0	0	0	0	0	0	0.9	0	0.9
GBP5	up	TRIM2	down	0	0	0	0	0	0	0.9	0	0.9
CD53	up	SLC27A2	down	0	0	0	0	0	0	0.9	0	0.9
BDKRB2	down	CCL28	up	0	0	0	0	0	0	0.9	0	0.9
HIST1H2BK	up	SAP30	up	0	0	0	0	0	0	0.9	0	0.9
ACPP	down	LPCAT1	up	0	0	0	0	0	0	0.9	0	0.9
PSMB10	up	CCND1	up	0	0	0	0	0	0	0.9	0.042	0.9
SPTBN2	down	HLA-DMB	up	0	0	0	0	0	0	0.9	0	0.9
GPC3	down	LGALS1	up	0	0	0	0	0	0	0.9	0.049	0.9
CCL28	up	FPR3	up	0	0	0	0	0	0	0.9	0.046	0.9
CYFIP2	down	FCGR2A	up	0	0	0	0	0	0	0.9	0	0.9
HLA-DRA	up	IRF6	down	0	0	0	0	0.049	0	0.9	0	0.9
CHGB	down	PROC	down	0	0	0	0	0	0	0.9	0	0.9
TRIM2	down	ICAM1	up	0	0	0	0	0	0	0.9	0	0.9
HLA-B	up	IRF6	down	0	0	0	0	0	0	0.9	0.043	0.9
TRIM22	up	IRF6	down	0	0	0	0	0	0	0.9	0	0.9
KLHL13	down	FBXO2	down	0	0	0	0	0	0	0.9	0	0.9
QRFPR	up	KNG1	down	0	0	0	0	0	0	0.9	0	0.9
PROC	down	LGALS1	up	0	0	0	0	0	0	0.9	0	0.9
STC2	up	APOB	up	0	0	0	0	0	0	0.9	0.044	0.9
GBP1	up	IRF6	down	0	0	0	0	0	0	0.9	0.046	0.9
APLN	up	FPR3	up	0	0	0	0	0	0	0.9	0.047	0.9
SCG2	up	C3	up	0	0	0	0	0	0	0.9	0	0.9
RNASET2	up	FABP5	up	0	0	0	0	0	0	0.9	0	0.9
HLA-E	up	TRIM2	down	0	0	0	0	0	0	0.9	0	0.9
HLA-DQB1	up	PAG1	up	0	0	0	0	0	0	0.9	0	0.9
SPTBN2	down	HLA-DPB1	up	0	0	0	0	0	0	0.9	0.041	0.9
GGH	down	DOCK2	up	0	0	0	0	0	0	0.9	0	0.9
FCER1G	up	SLC2A3	up	0	0	0	0	0	0	0.9	0	0.9
SPTBN2	down	HLA-DQA1	up	0	0	0	0	0	0	0.9	0	0.9
GGH	down	C3	up	0	0	0	0	0	0	0.9	0	0.9
STC2	up	PROC	down	0	0	0	0	0	0	0.9	0	0.9
GPC3	down	CHGB	down	0	0	0	0	0	0	0.9	0	0.9
PLAU	down	SLC27A2	down	0	0	0	0	0	0	0.9	0	0.9
LPAR5	up	CXCL10	up	0	0	0	0	0	0	0.9	0	0.9
SH3GL2	down	CD3D	up	0	0	0	0	0	0	0.9	0	0.9
HLA-DPB1	up	AP1M2	down	0	0	0	0	0	0	0.9	0	0.9
CASR	down	CXCL9	up	0	0	0	0	0	0	0.9	0	0.9
PBX1	down	HIST1H2BK	up	0	0	0	0	0	0	0.9	0	0.9
GBP5	up	IRF6	down	0	0	0	0	0	0	0.9	0	0.9
BDKRB2	down	QRFPR	up	0	0	0	0.611	0	0	0.9	0	0.9
BDKRB2	down	CXCL9	up	0	0	0	0	0	0	0.9	0.047	0.9
FBXO2	down	KLHL3	down	0	0	0	0	0	0	0.9	0	0.9
BDKRB2	down	GCGR	down	0	0	0	0	0	0	0.9	0	0.9
CD36	up	RAB37	up	0	0	0	0	0	0	0.9	0.043	0.9
CHGB	down	LGALS1	up	0	0	0	0	0	0	0.9	0	0.9
LYZ	up	ACLY	up	0	0	0	0	0	0	0.9	0	0.9
CHGB	down	TIMP1	up	0	0	0	0	0	0	0.9	0	0.9
NMB	up	PTGER1	down	0	0	0	0	0	0	0.9	0	0.9
GPR4	up	PTGER1	down	0	0	0	0	0	0	0.9	0	0.9
BDKRB2	down	FPR3	up	0	0	0	0.661	0	0	0.9	0.059	0.9
TNFRSF1B	up	SLC2A3	up	0	0	0	0	0	0	0.9	0.045	0.9
HLA-DQB2	up	ICAM1	up	0	0	0	0	0	0	0.9	0	0.9
CCL20	up	LPAR5	up	0	0	0	0	0	0	0.9	0	0.9
BDKRB2	down	GPR4	up	0	0	0	0.67	0	0	0.9	0	0.9
CHRDL1	down	SCG2	up	0	0	0	0	0	0	0.9	0	0.9
STC2	up	KNG1	down	0	0	0	0	0	0	0.9	0.041	0.9
HLA-DQB2	up	PAG1	up	0	0	0	0	0	0	0.9	0.041	0.9
GBP2	up	IRF6	down	0	0	0	0	0	0	0.9	0	0.9
ADORA3	up	CCL28	up	0	0	0	0	0	0	0.9	0	0.9
LPAR5	up	KISS1R	up	0	0	0	0.615	0	0	0.9	0.061	0.9
FABP5	up	PYCARD	up	0	0	0	0	0	0	0.9	0	0.9
RAB37	up	PIGR	down	0	0	0	0	0	0	0.9	0	0.9
CHRDL1	down	APOB	up	0	0	0	0	0	0	0.9	0	0.9
HLA-DQB2	up	AP1M2	down	0	0	0	0	0	0	0.9	0	0.9
BDKRB2	down	SUCNR1	down	0	0	0	0.67	0	0	0.9	0	0.9
STC2	up	CP	up	0	0	0	0	0	0	0.9	0	0.9
GGH	down	TNFAIP6	up	0	0	0	0	0	0	0.9	0	0.9
LYPD6B	down	XPNPEP2	down	0	0	0	0	0	0	0.9	0	0.9
GP2	down	CD52	up	0	0	0	0	0	0	0.9	0	0.9
LYPD6B	down	GP2	down	0	0	0	0	0	0	0.9	0	0.9
HLA-DPB1	up	SH3GL2	down	0	0	0	0	0	0	0.9	0	0.9
HLA-DQB1	up	AP1M2	down	0	0	0	0	0	0	0.9	0	0.9
XPNPEP2	down	NTNG1	down	0	0	0	0	0	0	0.9	0	0.9
ASB9	down	FBXO2	down	0	0	0	0	0	0	0.9	0	0.9
HLA-G	up	IRF6	down	0	0	0	0	0	0	0.9	0.043	0.9
SH3GL2	down	APOB	up	0	0	0	0	0	0	0.9	0.05	0.9
CP	up	LAMC1	up	0	0	0	0	0	0	0.9	0	0.9
PLAU	down	FCER1G	up	0	0	0	0	0	0	0.9	0	0.9
IL4I1	up	BCKDHB	down	0	0	0	0	0.05	0	0.9	0	0.9
ESRP1	down	VWF	up	0	0	0	0	0	0	0.9	0	0.9
ITGAL	up	SLC2A3	up	0	0	0	0	0.048	0	0.9	0	0.9
FCGR1B	up	TRIM2	down	0	0	0	0	0	0	0.9	0	0.9
SCG2	up	APOB	up	0	0	0	0	0	0	0.9	0	0.9
FOLR3	down	ALDOC	up	0	0	0	0	0	0	0.9	0	0.9
ACAA1	down	LYZ	up	0	0	0	0	0	0	0.9	0	0.9
CHGB	down	STC2	up	0	0	0	0	0	0	0.9	0	0.9
SCG2	up	CP	up	0	0	0	0	0	0	0.9	0	0.9
APLN	up	C3	up	0	0	0	0	0	0	0.9	0	0.9
ACAA1	down	DOCK2	up	0	0	0	0	0	0	0.9	0	0.9
CYBB	up	SLC27A2	down	0	0	0	0	0	0	0.9	0.05	0.9
QRFPR	up	PTGER1	down	0	0	0	0	0	0	0.9	0	0.9
GCGR	down	LPAR5	up	0	0	0	0	0	0	0.9	0.049	0.9
SCNN1A	down	SCN4B	up	0	0	0	0	0	0	0.9	0	0.9
CHRDL1	down	VCAN	up	0	0	0	0	0	0	0.9	0.047	0.9
